# Supplementary material
Source: MDPI journal article supplement (https://www.mdpi.com/2073-4344/12/3/312)
Supplement: s1 [file s1]

*Supporting Information*

# **Transition Metal-Catalyzed and MAO-Assisted Olefin Polymerization. Cyclic Isomers of Sinn's Dimer Are Excellent Ligands in Iron Complexes and Great Methylating Reagents**

**Kaidi Yang<sup>1</sup> and Rainer Glaser<sup>1,2,\*</sup>**

<sup>1</sup> Department of Chemistry, University of Missouri, Columbia, MO 65211, USA;  
kyn69@umsystem.edu

<sup>2</sup> Department of Chemistry, Missouri University of Science & Technology, Rolla, MO 65409,  
USA

\* Correspondence: glaserr@umsystem.edu

## TABLE ON CONTENTS

|                                                                                                                                                                             |     |
|-----------------------------------------------------------------------------------------------------------------------------------------------------------------------------|-----|
| <b>Table S1.</b> Computed Energies of MAO Species .....                                                                                                                     | S3  |
| <b>Table S2.</b> Computed Energies of Iron Pre-catalyst .....                                                                                                               | S4  |
| <b>Table S3.</b> Vibration Modes Involving Bonding Between $[L(R)_2FeCl]^-$ and MAO Moieties.....                                                                           | S5  |
| <b>Figure S1.</b> Computed structures of <b>1</b> , <b>2</b> , <b>3</b> , <b>4</b> , and <b>7</b> .....                                                                     | S5  |
| <b>Figure S2.</b> Computed structures of <b>5</b> : <b>5a</b> , <b>5b</b> , and <b>5c</b> .....                                                                             | S7  |
| <b>Figure S3.</b> Computed structures of TSRF( <b>5a,5b</b> ), TSMT( <b>5b,5c</b> ) and ATS( <b>5c</b> ) .....                                                              | S8  |
| <b>Figure S4.</b> Structure of $L(Me)_2FeCl_{ax}(5b)_{eq}$ with vibrational displacement vectors .....                                                                      | S9  |
| <b>Cartesian Coordinates of Stationary Structures</b>                                                                                                                       |     |
| MAO Species .....                                                                                                                                                           | S10 |
| TMA, <b>1</b> .....                                                                                                                                                         | S10 |
| DMAH, <b>2</b> .....                                                                                                                                                        | S10 |
| MeAlO, <b>3</b> .....                                                                                                                                                       | S10 |
| Me <sub>2</sub> Al–O–AlMe <sub>2</sub> , <b>4</b> .....                                                                                                                     | S11 |
| Me <sub>2</sub> Al–O–AlMe–O–AlMe <sub>2</sub> , <b>5</b> .....                                                                                                              | S11 |
| <b>5a</b> (acyclic) .....                                                                                                                                                   | S11 |
| <b>5b</b> (cyclic) .....                                                                                                                                                    | S12 |
| <b>5c</b> (cyclic dibridged) .....                                                                                                                                          | S12 |
| TSRF( <b>5a,5b</b> ) .....                                                                                                                                                  | S13 |
| TSMT( <b>5b,5c</b> ) .....                                                                                                                                                  | S13 |
| ATS( <b>5c</b> ) .....                                                                                                                                                      | S14 |
| (MeAlO) <sub>2</sub> , <b>7</b> .....                                                                                                                                       | S15 |
| Iron Pre-catalysts.....                                                                                                                                                     | S15 |
| L(Me) <sub>2</sub> FeCl <sub>2</sub> , C <sub>2v</sub> .....                                                                                                                | S15 |
| [L(Me) <sub>2</sub> FeCl] <sup>+</sup> , C <sub>s</sub> .....                                                                                                               | S16 |
| L(Ph) <sub>2</sub> FeCl <sub>2</sub> , C <sub>1</sub> .....                                                                                                                 | S16 |
| L(Ph) <sub>2</sub> FeCl <sub>2</sub> , C <sub>s</sub> .....                                                                                                                 | S17 |
| [L(Ph) <sub>2</sub> FeCl] <sup>+</sup> , disrot. I, C <sub>s</sub> .....                                                                                                    | S18 |
| [L(Ph) <sub>2</sub> FeCl] <sup>+</sup> , disrot. II, C <sub>s</sub> .....                                                                                                   | S19 |
| [L(Ph) <sub>2</sub> FeCl] <sup>+</sup> , conrot., III, C <sub>1</sub> .....                                                                                                 | S20 |
| Active Catalysts, Iron-MAO Adducts.....                                                                                                                                     | S21 |
| [L(Me) <sub>2</sub> FeCl <sub>ax</sub> ( <b>4</b> ) <sub>eq</sub> ] <sup>+</sup> and [L(Me) <sub>2</sub> FeCl <sub>eq</sub> ( <b>4</b> ) <sub>ax</sub> ] <sup>+</sup> ..... | S21 |
| [L(Me) <sub>2</sub> FeCl <sub>ax</sub> ( <b>7</b> ) <sub>eq</sub> ] <sup>+</sup> and [L(Me) <sub>2</sub> FeCl <sub>eq</sub> ( <b>7</b> ) <sub>ax</sub> ] <sup>+</sup> ..... | S23 |
| [L(Me) <sub>2</sub> FeCl <sub>ax</sub> ( <b>5</b> ) <sub>eq</sub> ] <sup>+</sup> and [L(Me) <sub>2</sub> FeCl <sub>eq</sub> ( <b>5</b> ) <sub>ax</sub> ] <sup>+</sup> ..... | S24 |
| [L(Ph) <sub>2</sub> FeCl <sub>ax</sub> ( <b>4</b> ) <sub>eq</sub> ] <sup>+</sup> and [L(Ph) <sub>2</sub> FeCl <sub>eq</sub> ( <b>4</b> ) <sub>ax</sub> ] <sup>+</sup> ..... | S26 |
| [L(Ph) <sub>2</sub> FeCl <sub>ax</sub> ( <b>7</b> ) <sub>eq</sub> ] <sup>+</sup> and [L(Ph) <sub>2</sub> FeCl <sub>eq</sub> ( <b>7</b> ) <sub>ax</sub> ] <sup>+</sup> ..... | S29 |
| [L(Ph) <sub>2</sub> FeCl <sub>ax</sub> ( <b>5</b> ) <sub>eq</sub> ] <sup>+</sup> and [L(Ph) <sub>2</sub> FeCl <sub>eq</sub> ( <b>5</b> ) <sub>ax</sub> ] <sup>+</sup> ..... | S31 |

**Table S1.** Computed Energies of MAO Species

| <b>Molecule</b>                             | <b><math>E_{\text{tot}}</math></b> | <b>TE</b> | <b><math>S</math></b> | <b><math>S_{\text{tr}}</math></b> | <b><math>S_{\text{tr,w}}</math></b> | <b><math>S_{\text{w}}</math></b> | <b><math>v_1</math></b> | <b><math>\mu</math></b> |
|---------------------------------------------|------------------------------------|-----------|-----------------------|-----------------------------------|-------------------------------------|----------------------------------|-------------------------|-------------------------|
| Methane                                     | -40.337043                         | 30.89     | 44.44                 | 34.26                             | 25.08                               | 35.26                            | 1413.9                  | 0.000                   |
| Water                                       | -76.199244                         | 15.27     | 45.13                 | 34.61                             | 25.27                               | 35.79                            | 1734.2                  | 2.242                   |
| OMe <sub>2</sub>                            | -154.515545                        | 54.29     | 64.21                 | 37.41                             | 26.78                               | 53.59                            | 222.4                   | 1.594                   |
| TMA, <b>1</b>                               | -361.228480                        | 74.02     | 92.08                 | 40.21                             | 28.29                               | 98.97                            | 28.9                    | 0.000                   |
| DMAH, <b>2</b>                              | -397.158987                        | 59.37     | 92.62                 | 40.26                             | 28.32                               | 95.25                            | 1.3                     | 1.658                   |
| MeAlO, <b>3</b>                             | -356.756670                        | 27.65     | 66.34                 | 38.09                             | 27.15                               | 55.40                            | 158.4                   | 6.308                   |
| Al <sub>2</sub> OMe <sub>4</sub> , <b>4</b> | -718.128741                        | 104.00    | 127.71                | 40.50                             | 28.45                               | 115.60                           | 21.6                    | 0.000                   |
| <b>5a</b>                                   | -1075.027255                       | 133.89    | 166.11                | 41.60                             | 29.04                               | 153.55                           | 14.6                    | 0.081                   |
| <b>5b</b>                                   | -1075.042973                       | 133.50    | 133.85                | 41.60                             | 29.04                               | 121.29                           | 33.8                    | 1.445                   |
| <b>5c</b>                                   | -1075.044494                       | 133.41    | 127.77                | 41.60                             | 29.04                               | 115.21                           | 76.9                    | 2.892                   |
| TSRF( <b>5a,5b</b> )                        | -1075.024754                       | 133.12    | 149.89                | 41.60                             | 29.04                               | 137.34                           | -51.6                   | 1.079                   |
| TSMT( <b>5b,5c</b> )                        | -1075.042775                       | 132.81    | 126.70                | 41.60                             | 29.04                               | 114.14                           | -61.9                   | 1.672                   |
| ATS( <b>5c</b> )                            | -1075.010100                       | 132.76    | 141.83                | 41.60                             | 29.04                               | 129.27                           | -31.1                   | 4.951                   |
| (MeAlO) <sub>2</sub> , <b>7</b>             | -713.725766                        | 57.70     | 100.70                | 40.16                             | 28.26                               | 88.81                            | 6.2                     | 0.000                   |

**Table S2.** Computed Energies of Iron Pre-catalyst

| <b>Molecule</b>                                               | <b><math>E_{\text{tot}}</math></b> | <b>VZPE</b> | <b>TE</b> | <b><math>S</math></b> | <b><math>\nu_1</math></b> | <b><math>\mu</math></b> | <b><math>U_0</math></b> | <b><math>U_{298}</math></b> | <b><math>G_{298}</math></b> |
|---------------------------------------------------------------|------------------------------------|-------------|-----------|-----------------------|---------------------------|-------------------------|-------------------------|-----------------------------|-----------------------------|
| L(Me) <sub>2</sub> FeCl <sub>2</sub> , C <sub>2v</sub>        | -2697.944566                       | 122.65      | 132.25    | 124.32                | 32.10                     | 6.58                    | -2697.749111            | -2697.733812                | -2697.792881                |
| [L(Me) <sub>2</sub> FeCl] <sup>+</sup> , C <sub>s</sub>       | -2237.466193                       | 122.25      | 130.72    | 114.79                | 45.70                     | 7.13                    | -2237.271375            | -2237.257878                | -2237.312418                |
| L(Ph) <sub>2</sub> FeCl <sub>2</sub> , C <sub>2</sub>         | -3081.420395                       | 188.63      | 202.17    | 157.24                | 34.60                     | 5.48                    | -3081.119794            | -3081.098217                | -3081.172927                |
| L(Ph) <sub>2</sub> FeCl <sub>2</sub> , C <sub>s</sub>         | -3081.420358                       | 188.64      | 202.18    | 157.94                | 30.70                     | 5.55                    | -3081.119741            | -3081.098164                | -3081.173206                |
| [L(Ph) <sub>2</sub> FeCl] <sup>+</sup> , C <sub>s</sub> , I   | -2620.952644                       | 188.23      | 200.63    | 149.28                | 34.00                     | 6.80                    | -2620.652681            | -2620.632920                | -2620.703848                |
| [L(Ph) <sub>2</sub> FeCl] <sup>+</sup> , C <sub>s</sub> , II  | -2620.946946                       | 187.73      | 200.30    | 154.87                | 6.92                      | 7.32                    | -2620.647777            | -2620.627754                | -2620.701338                |
| [L(Ph) <sub>2</sub> FeCl] <sup>+</sup> , C <sub>1</sub> , III | -2620.951697                       | 188.07      | 200.51    | 148.79                | 32.40                     | 6.86                    | -2620.651989            | -2620.632164                | -2620.702859                |

**Table S3.** Vibration Modes Involving Bonding Between [L(R)<sub>2</sub>FeCl]<sup>-</sup> and MAO Moieties

| Mode Number                                                       | Mode name    | Frequency | Infrared intensity | Raman activity |
|-------------------------------------------------------------------|--------------|-----------|--------------------|----------------|
| L(Me) <sub>2</sub> FeCl <sub>ax</sub> ( <b>4</b> ) <sub>eq</sub>  |              |           |                    |                |
| 22                                                                | Cl-Fe        | 214.9     | 16.2               | 1.4            |
| 28                                                                | Fe-Cl, Al-Cl | 295.9     | 21.5               | 3.6            |
| 40                                                                | Fe-O         | 500.9     | 25.0               | 5.7            |
| L(Ph) <sub>2</sub> FeCl <sub>ax</sub> ( <b>4</b> ) <sub>eq</sub>  |              |           |                    |                |
| 30                                                                | Cl-Al        | 253.7     | 29.3               | 2.5            |
| 34                                                                | Fe-Cl        | 304.1     | 11.2               | 5.2            |
| 46                                                                | Fe-O         | 536.9     | 36.0               | 14.9           |
| L(Me) <sub>2</sub> FeCl <sub>ax</sub> ( <b>7</b> ) <sub>eq</sub>  |              |           |                    |                |
| 21                                                                | Fe-Cl        | 271.6     | 17.5               | 0.8            |
| 23                                                                | Cl-Al        | 311.0     | 10.4               | 4.4            |
| 47                                                                | Fe-O         | 761.9     | 266.5              | 19.8           |
| 48                                                                | Fe-O         | 801.0     | 605.0              | 5.3            |
| L(Ph) <sub>2</sub> FeCl <sub>ax</sub> ( <b>7</b> ) <sub>eq</sub>  |              |           |                    |                |
| 17                                                                | Cl-Al        | 164.8     | 7.1                | 2.6            |
| 18                                                                | Fe-Cl        | 168.0     | 0.7                | 3.7            |
| 25                                                                | Cl-Al, Fe-Al | 260.9     | 12.4               | 3.3            |
| 27                                                                | Fe-Cl        | 291.7     | 2.5                | 1.5            |
| 28                                                                | Cl-Al        | 316.5     | 16.2               | 8.2            |
| 30                                                                | Al-O         | 352.6     | 25.8               | 1.9            |
| 39                                                                | Fe-O         | 488.9     | 23.2               | 3.4            |
| 61                                                                | Fe-O         | 752.1     | 318.2              | 5.4            |
| L(Me) <sub>2</sub> FeCl <sub>ax</sub> ( <b>5b</b> ) <sub>eq</sub> |              |           |                    |                |
| 26                                                                | Fe-Cl        | 201.8     | 7.4                | 1.1            |
| 34                                                                | Cl-Al        | 307.2     | 10.0               | 4.6            |
| 40                                                                | Cl-Al        | 392.0     | 14.6               | 5.8            |
| 42                                                                | Fe-O         | 413.9     | 8.4                | 2.8            |
| 44                                                                | Fe-Cl        | 463.1     | 25.2               | 2.5            |
| 47                                                                | Fe-O, Cl-Al  | 505.9     | 60.5               | 18.8           |
| 57                                                                | Fe-O         | 673.6     | 55.5               | 20.1           |
| 61                                                                | Fe-O         | 698.8     | 69.2               | 7.4            |
| L(Ph) <sub>2</sub> FeCl <sub>ax</sub> ( <b>5b</b> ) <sub>eq</sub> |              |           |                    |                |
| 36                                                                | Fe-Cl        | 261.0     | 18.1               | 1.5            |
| 39                                                                | Al-Cl        | 306.5     | 7.8                | 4.9            |
| 44                                                                | Cl-Al        | 385.3     | 28.0               | 5.7            |
| 49                                                                | Fe-O         | 431.4     | 12.8               | 8.6            |
| 52                                                                | Cl-Al, Fe-O  | 498.4     | 51.1               | 8.5            |
| 69                                                                | Fe-O         | 676.0     | 26.1               | 13.9           |
| 71                                                                | Fe-O         | 694.8     | 76.1               | 3.0            |
| 73                                                                | Fe-O         | 701.1     | 28.7               | 3.7            |
| 91                                                                | Fe-O         | 875.6     | 321.0              | 3.3            |

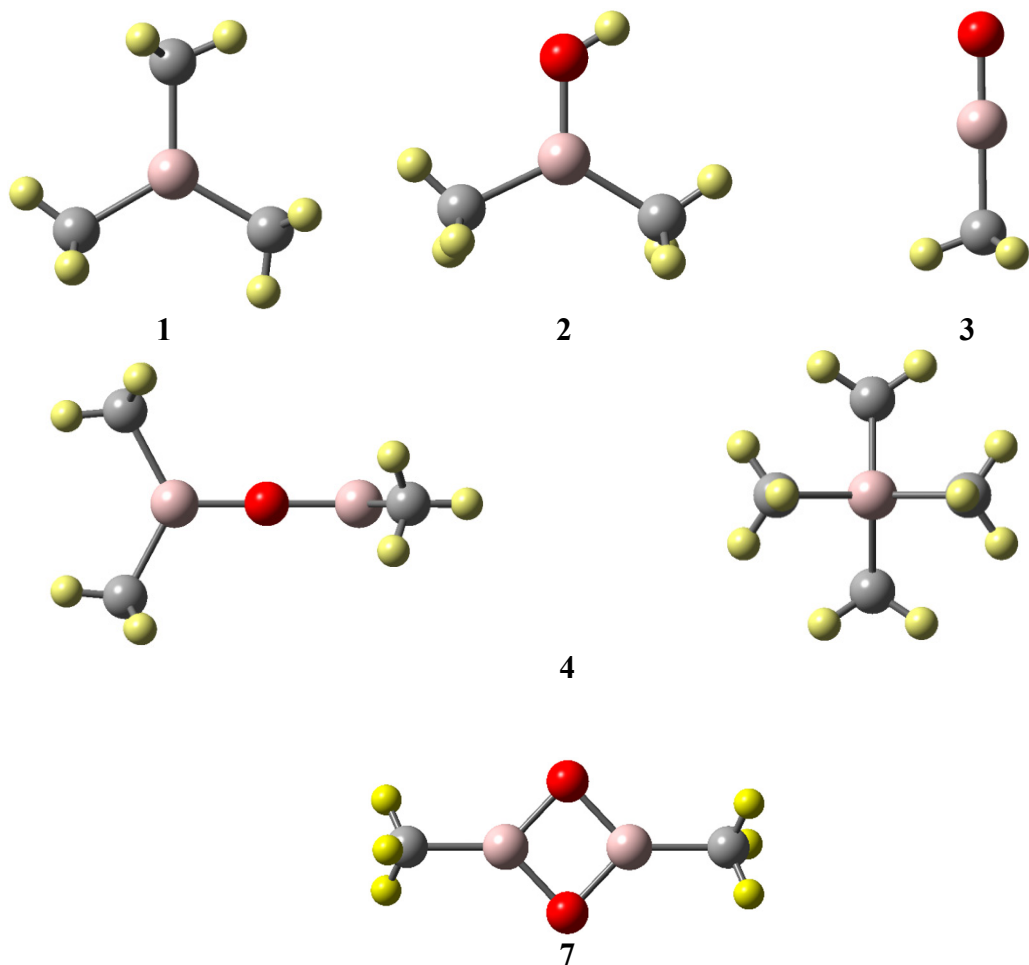

**Figure S1.** Computed structures of trimethylaluminum **1**, of dimethylaluminumhydroxide **2**, of methylaluminum oxide **3**, of permethyldialuminumoxane **4**, and of cyclodialuminumoxane **7**.

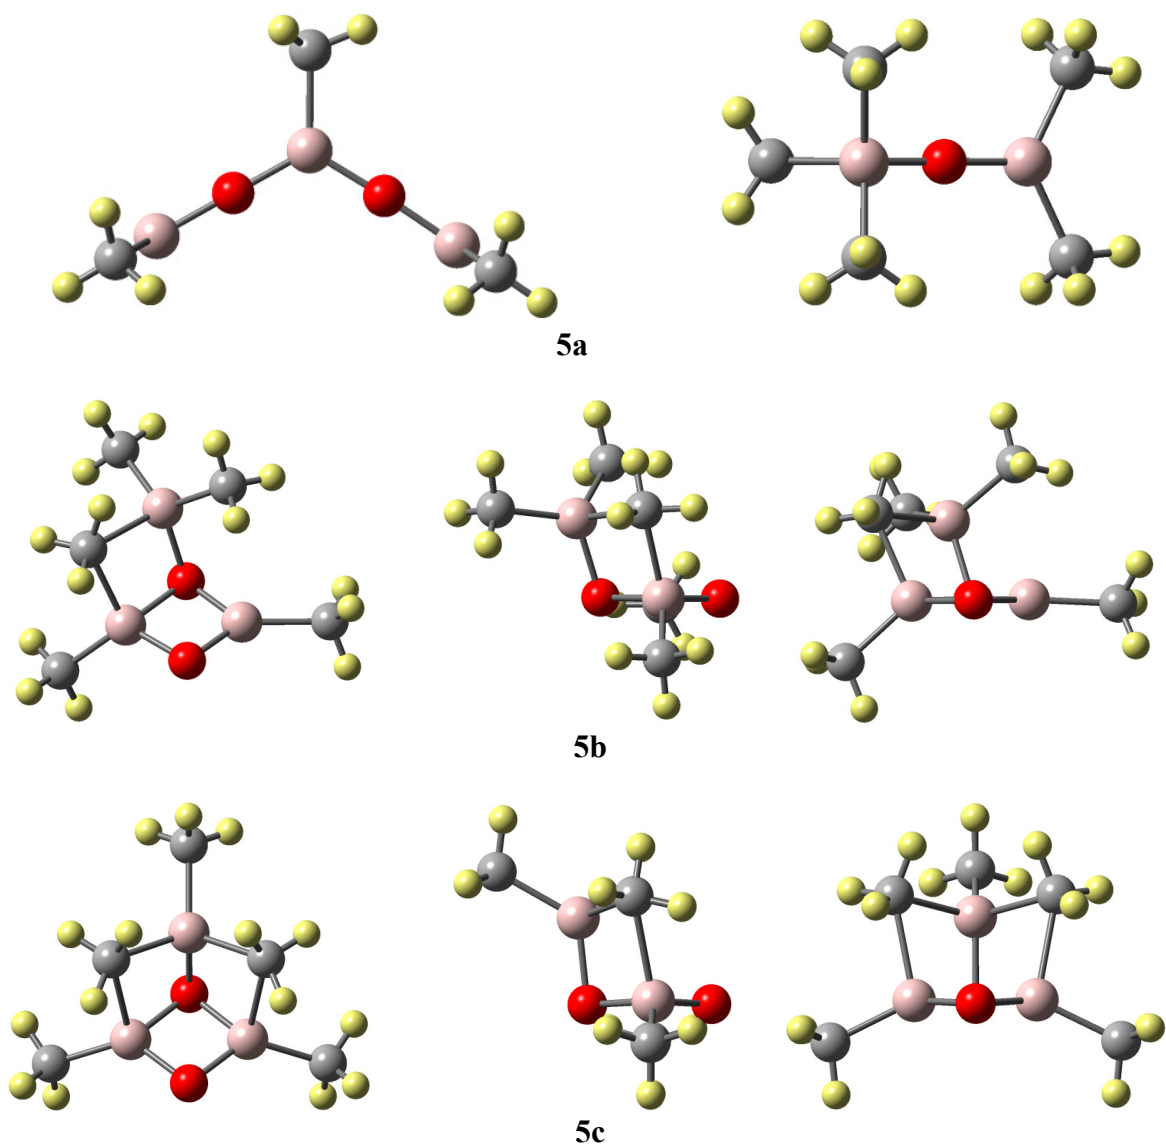

**Figure S2.** Computed structures of permethyltrialuminoxane **5**: Acyclic allene structure **5a**, cyclic, monobridged structure **5b**, and cyclic, dibridged structure **5c**.

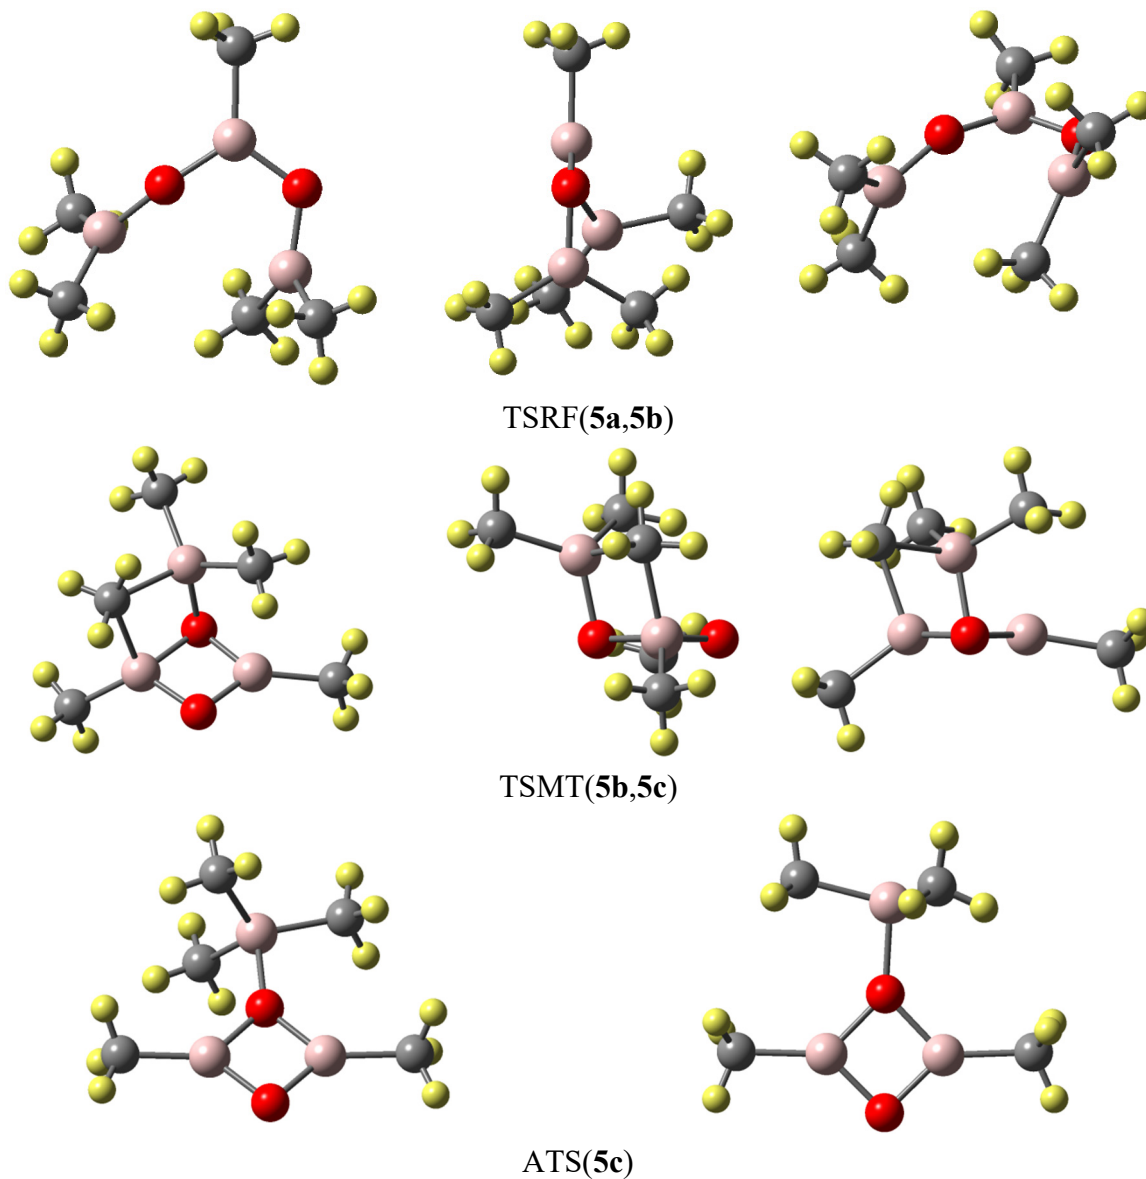

**Figure S3.** Computed structures of the transition state structures TSRF(**5a,5b**) for ring formation, of the transition state structure TSMT(**5b,5c**) for methyl transfer between **5b** and **5c**, and of the transition state structure ATS(**5c**) for automerization **5c**  $\rightleftharpoons$  **5c**.



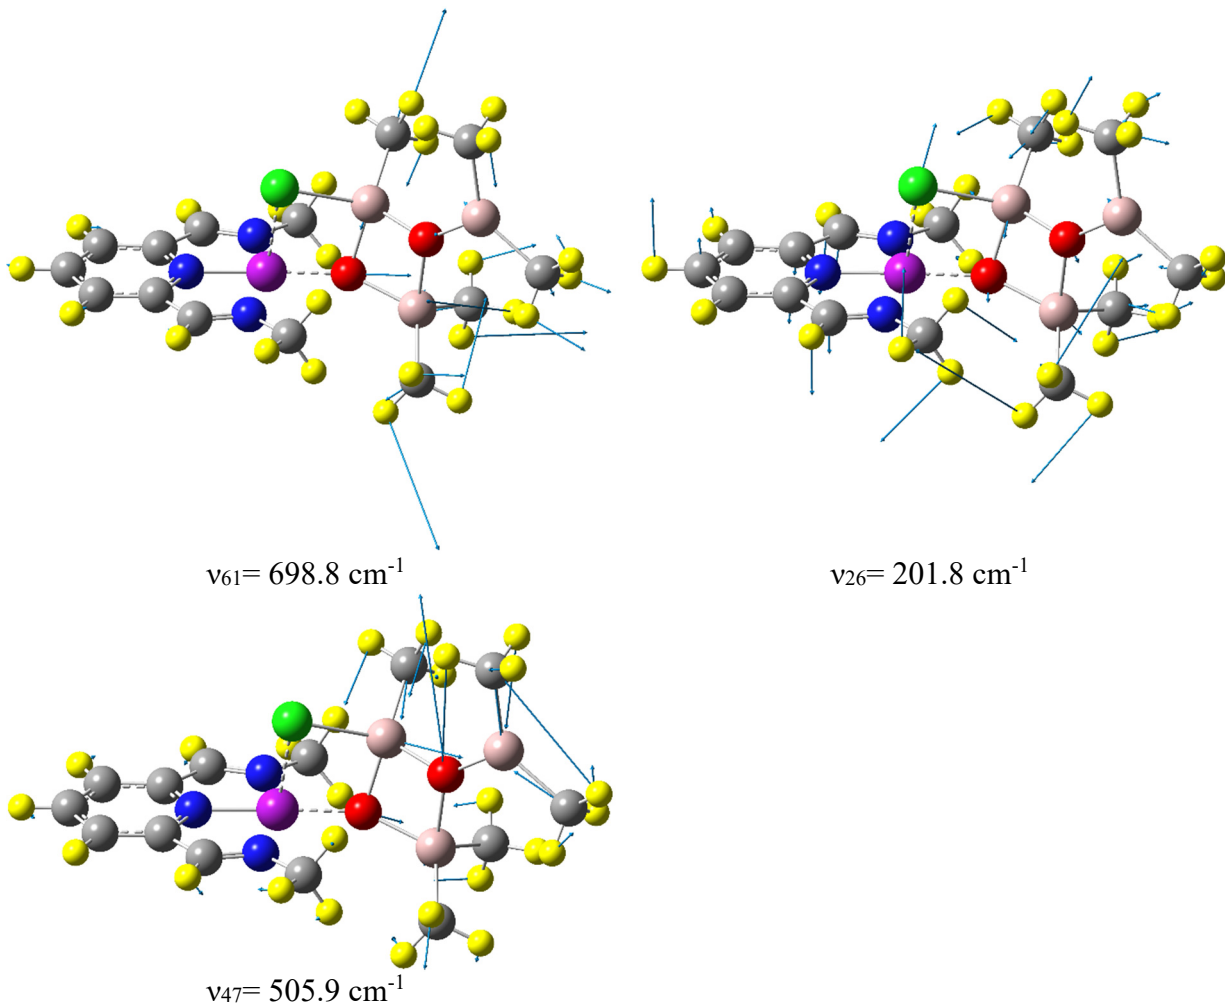

**Figure S4.** Computed structure of L(Me)<sub>2</sub>FeCl<sub>ax</sub>(**5b**)<sub>eq</sub> with vibrational displacement vectors for modes  $\nu_{61}$  (Fe-O bond),  $\nu_{26}$  (Fe-Cl bond), and  $\nu_{47}$  (Fe-O and Cl-Al bonds).

## Cartesian Coordinates of Stationary Structures

### MAO Species Calculated at MP2(full)/6-31G\*

#### Trimethylaluminum (TMA), Me<sub>3</sub>Al (de facto C<sub>3</sub>), 1

| Center<br>Number | Atomic<br>Number | Atomic<br>Type | Coordinates (Angstroms) |           |           |
|------------------|------------------|----------------|-------------------------|-----------|-----------|
|                  |                  |                | X                       | Y         | Z         |
| 1                | 13               | 0              | -0.000069               | -0.000073 | -0.000384 |
| 2                | 6                | 0              | 0.477963                | 1.910146  | 0.000130  |
| 3                | 1                | 0              | 0.061628                | 2.421647  | 0.875819  |
| 4                | 1                | 0              | 1.557134                | 2.087226  | -0.000708 |
| 5                | 1                | 0              | 0.060254                | 2.422707  | -0.874292 |
| 6                | 6                | 0              | 1.415494                | -1.368878 | 0.000129  |
| 7                | 1                | 0              | 2.065785                | -1.264791 | 0.876524  |
| 8                | 1                | 0              | 1.029622                | -2.392158 | -0.001989 |
| 9                | 1                | 0              | 2.068863                | -1.262365 | -0.873686 |
| 10               | 6                | 0              | -1.893368               | -0.541207 | -0.000060 |
| 11               | 1                | 0              | -2.131621               | -1.144882 | 0.883518  |
| 12               | 1                | 0              | -2.586257               | 0.304771  | -0.014926 |
| 13               | 1                | 0              | -2.125045               | -1.171573 | -0.866455 |

#### Dimethylaluminumhydroxide (DMAH), Me<sub>2</sub>AlOH, 2

| Center<br>Number | Atomic<br>Number | Atomic<br>Type | Coordinates (Angstroms) |           |           |
|------------------|------------------|----------------|-------------------------|-----------|-----------|
|                  |                  |                | X                       | Y         | Z         |
| 1                | 13               | 0              | -0.001104               | 0.045491  | 0.000199  |
| 2                | 8                | 0              | -0.057981               | 1.773609  | -0.001360 |
| 3                | 6                | 0              | 1.711977                | -0.913670 | 0.000871  |
| 4                | 1                | 0              | 1.839706                | -1.473796 | -0.932168 |
| 5                | 1                | 0              | 2.584646                | -0.263895 | 0.111441  |
| 6                | 1                | 0              | 1.745582                | -1.650121 | 0.810897  |
| 7                | 6                | 0              | -1.739016               | -0.849663 | -0.000833 |
| 8                | 1                | 0              | -1.819734               | -1.583681 | -0.809130 |
| 9                | 1                | 0              | -1.906852               | -1.395779 | 0.933661  |
| 10               | 1                | 0              | -2.556311               | -0.133166 | -0.115242 |
| 11               | 1                | 0              | 0.753403                | 2.300190  | 0.008607  |

#### Methylaluminumoxide, MeAlO (de facto C<sub>3v</sub>), 3

| Center<br>Number | Atomic<br>Number | Atomic<br>Type | Coordinates (Angstroms) |           |           |
|------------------|------------------|----------------|-------------------------|-----------|-----------|
|                  |                  |                | X                       | Y         | Z         |
| 1                | 13               | 0              | 0.188025                | 0.000304  | 0.000021  |
| 2                | 8                | 0              | 1.818507                | -0.000269 | -0.000018 |
| 3                | 6                | 0              | -1.760432               | -0.000085 | -0.000017 |
| 4                | 1                | 0              | -2.143573               | 1.022611  | -0.019614 |
| 5                | 1                | 0              | -2.143091               | -0.528934 | -0.875881 |
| 6                | 1                | 0              | -2.143119               | -0.494965 | 0.895470  |

-----  
**Me<sub>2</sub>Al–O–AlMe<sub>2</sub>, C<sub>2</sub>, Sinn-Monomer, Permethylaluminoxane, 4**  
-----

| Center<br>Number | Atomic<br>Number | Atomic<br>Type | Coordinates (Angstroms) |           |           |
|------------------|------------------|----------------|-------------------------|-----------|-----------|
|                  |                  |                | X                       | Y         | Z         |
| 1                | 13               | 0              | 0.000000                | 0.000000  | -1.717991 |
| 2                | 13               | 0              | 0.000000                | 0.000000  | 1.718016  |
| 3                | 8                | 0              | 0.000000                | 0.000000  | 0.000012  |
| 4                | 6                | 0              | 1.732368                | 0.000632  | 2.637615  |
| 5                | 1                | 0              | 2.323346                | 0.881245  | 2.364300  |
| 6                | 1                | 0              | 1.632452                | -0.005192 | 3.726733  |
| 7                | 1                | 0              | 2.329284                | -0.873011 | 2.355135  |
| 8                | 6                | 0              | 0.000000                | 1.732349  | -2.637629 |
| 9                | 1                | 0              | 0.017668                | 1.632455  | -3.726622 |
| 10               | 1                | 0              | -0.887045               | 2.318083  | -2.373806 |
| 11               | 1                | 0              | 0.866951                | 2.334460  | -2.345861 |
| 12               | 6                | 0              | 0.000000                | -1.732349 | -2.637629 |
| 13               | 1                | 0              | -0.017668               | -1.632455 | -3.726622 |
| 14               | 1                | 0              | 0.887045                | -2.318083 | -2.373806 |
| 15               | 1                | 0              | -0.866951               | -2.334460 | -2.345861 |
| 16               | 6                | 0              | -1.732368               | -0.000632 | 2.637615  |
| 17               | 1                | 0              | -1.632452               | 0.005192  | 3.726733  |
| 18               | 1                | 0              | -2.329284               | 0.873011  | 2.355135  |
| 19               | 1                | 0              | -2.323346               | -0.881245 | 2.364300  |

-----

**Me<sub>2</sub>Al–O–AlMe–O–AlMe<sub>2</sub>, Sinn-Dimer, Permethyltrialuminoxane, 5  
Acyclic, 5a**  
-----

| Center<br>Number | Atomic<br>Number | Atomic<br>Type | Coordinates (Angstroms) |           |           |
|------------------|------------------|----------------|-------------------------|-----------|-----------|
|                  |                  |                | X                       | Y         | Z         |
| 1                | 13               | 0              | 2.944640                | -0.526462 | 0.000016  |
| 2                | 13               | 0              | -2.930534               | -0.546943 | 0.000019  |
| 3                | 13               | 0              | 0.001836                | 1.227717  | -0.000015 |
| 4                | 8                | 0              | 1.491139                | 0.388770  | 0.000000  |
| 5                | 8                | 0              | -1.462586               | 0.344449  | 0.000020  |
| 6                | 6                | 0              | -0.051104               | 3.179344  | -0.000119 |
| 7                | 1                | 0              | 0.948073                | 3.621242  | 0.000386  |
| 8                | 1                | 0              | -0.584787               | 3.554868  | -0.878669 |
| 9                | 1                | 0              | -0.585748               | 3.554970  | 0.877799  |
| 10               | 6                | 0              | 3.723884                | -1.012044 | -1.732546 |
| 11               | 1                | 0              | 4.646483                | -1.590991 | -1.633562 |
| 12               | 1                | 0              | 3.022236                | -1.605738 | -2.328008 |
| 13               | 1                | 0              | 3.954544                | -0.119947 | -2.324448 |
| 14               | 6                | 0              | 3.723952                | -1.011872 | 1.732596  |
| 15               | 1                | 0              | 4.646779                | -1.590460 | 1.633632  |
| 16               | 1                | 0              | 3.954213                | -0.119743 | 2.324602  |
| 17               | 1                | 0              | 3.022489                | -1.605901 | 2.327944  |
| 18               | 6                | 0              | -3.718040               | -1.019993 | 1.732386  |
| 19               | 1                | 0              | -3.959089               | -0.122976 | 2.312762  |
| 20               | 1                | 0              | -4.636461               | -1.605532 | 1.633233  |
| 21               | 1                | 0              | -3.016780               | -1.602254 | 2.339339  |
| 22               | 6                | 0              | -3.717959               | -1.020121 | -1.732351 |

|    |   |   |           |           |           |
|----|---|---|-----------|-----------|-----------|
| 23 | 1 | 0 | -3.958945 | -0.123149 | -2.312823 |
| 24 | 1 | 0 | -3.016683 | -1.602461 | -2.339210 |
| 25 | 1 | 0 | -4.636404 | -1.605622 | -1.633198 |

-----  
 Rotational constants (GHZ):      1.0297717      0.3181704      0.3009739  
 Standard basis: 6-31G(d) (6D, 7F)

### Cyclic, Monobridged, 5b

| Center<br>Number | Atomic<br>Number | Atomic<br>Type | Coordinates (Angstroms) |           |           |
|------------------|------------------|----------------|-------------------------|-----------|-----------|
|                  |                  |                | X                       | Y         | Z         |
| 1                | 13               | 0              | 0.566125                | 1.360551  | 0.154272  |
| 2                | 13               | 0              | 0.778139                | -1.313117 | -0.083021 |
| 3                | 13               | 0              | -1.754027               | 0.359317  | -0.153344 |
| 4                | 8                | 0              | -1.066050               | 1.581879  | 0.856720  |
| 5                | 8                | 0              | -0.180885               | -0.013632 | -0.962094 |
| 6                | 6                | 0              | -3.514228               | -0.360981 | -0.518292 |
| 7                | 1                | 0              | -4.172926               | 0.402478  | -0.942310 |
| 8                | 1                | 0              | -3.464305               | -1.194017 | -1.223637 |
| 9                | 1                | 0              | -3.982625               | -0.721276 | 0.401855  |
| 10               | 6                | 0              | 1.625186                | 2.822622  | -0.581201 |
| 11               | 1                | 0              | 2.496931                | 2.462675  | -1.136430 |
| 12               | 1                | 0              | 1.026357                | 3.430331  | -1.266834 |
| 13               | 1                | 0              | 1.992077                | 3.494343  | 0.202029  |
| 14               | 6                | 0              | 1.814901                | 0.109349  | 1.272172  |
| 15               | 1                | 0              | 2.846643                | 0.277057  | 0.949067  |
| 16               | 1                | 0              | 1.619650                | 0.814146  | 2.097423  |
| 17               | 1                | 0              | 1.806778                | -0.841472 | 1.824436  |
| 18               | 6                | 0              | -0.518283               | -2.294865 | 1.052310  |
| 19               | 1                | 0              | -1.273886               | -2.829103 | 0.463228  |
| 20               | 1                | 0              | -0.010540               | -3.059487 | 1.652831  |
| 21               | 1                | 0              | -1.056374               | -1.668685 | 1.778041  |
| 22               | 6                | 0              | 2.236569                | -2.168971 | -1.068109 |
| 23               | 1                | 0              | 1.855061                | -2.890733 | -1.798411 |
| 24               | 1                | 0              | 2.833762                | -1.437687 | -1.622524 |
| 25               | 1                | 0              | 2.920940                | -2.715247 | -0.409843 |

-----  
 Rotational constants (GHZ):      0.9441023      0.8246476      0.5421935  
 Standard basis: 6-31G(d) (6D, 7F)

### Cyclic, Dibridged, 5c

| Center<br>Number | Atomic<br>Number | Atomic<br>Type | Coordinates (Angstroms) |           |           |
|------------------|------------------|----------------|-------------------------|-----------|-----------|
|                  |                  |                | X                       | Y         | Z         |
| 1                | 13               | 0              | 0.452753                | -0.804067 | 1.273405  |
| 2                | 13               | 0              | -0.762363               | 1.185811  | 0.000000  |
| 3                | 13               | 0              | 0.452753                | -0.804067 | -1.273405 |
| 4                | 8                | 0              | 1.630318                | -1.093579 | 0.000000  |
| 5                | 8                | 0              | -0.912089               | -0.623934 | 0.000000  |
| 6                | 6                | 0              | 0.240537                | -1.638355 | -3.015960 |
| 7                | 1                | 0              | 0.040620                | -2.708518 | -2.904420 |
| 8                | 1                | 0              | -0.589522               | -1.207937 | -3.584017 |
| 9                | 1                | 0              | 1.144149                | -1.541438 | -3.625982 |
| 10               | 6                | 0              | 0.240537                | -1.638355 | 3.015960  |

|    |   |   |           |           |           |
|----|---|---|-----------|-----------|-----------|
| 11 | 1 | 0 | -0.589522 | -1.207937 | 3.584017  |
| 12 | 1 | 0 | 0.040620  | -2.708518 | 2.904420  |
| 13 | 1 | 0 | 1.144149  | -1.541438 | 3.625982  |
| 14 | 6 | 0 | 0.452753  | 1.414136  | 1.684402  |
| 15 | 1 | 0 | -0.158945 | 1.625632  | 2.567820  |
| 16 | 1 | 0 | 1.406083  | 1.008837  | 2.058746  |
| 17 | 1 | 0 | 0.792415  | 2.386756  | 1.298176  |
| 18 | 6 | 0 | 0.452753  | 1.414136  | -1.684402 |
| 19 | 1 | 0 | -0.158945 | 1.625632  | -2.567820 |
| 20 | 1 | 0 | 0.792415  | 2.386756  | -1.298176 |
| 21 | 1 | 0 | 1.406083  | 1.008837  | -2.058746 |
| 22 | 6 | 0 | -2.250518 | 2.447113  | 0.000000  |
| 23 | 1 | 0 | -2.886636 | 2.310307  | -0.880468 |
| 24 | 1 | 0 | -2.886636 | 2.310307  | 0.880468  |
| 25 | 1 | 0 | -1.919395 | 3.490954  | 0.000000  |

### TSRF(5a,5b)

| Center<br>Number | Atomic<br>Number | Atomic<br>Type | Coordinates (Angstroms) |           |           |
|------------------|------------------|----------------|-------------------------|-----------|-----------|
|                  |                  |                | X                       | Y         | Z         |
| 1                | 13               | 0              | 2.073454                | -0.302520 | -0.277417 |
| 2                | 13               | 0              | -1.813911               | -0.965592 | 0.380302  |
| 3                | 13               | 0              | -0.632419               | 1.699885  | -0.148178 |
| 4                | 8                | 0              | 0.695414                | 0.689101  | -0.576718 |
| 5                | 8                | 0              | -1.979421               | 0.766156  | 0.380829  |
| 6                | 6                | 0              | -0.611242               | 3.641615  | -0.275365 |
| 7                | 1                | 0              | -0.239417               | 3.975398  | -1.248246 |
| 8                | 1                | 0              | -1.610117               | 4.059615  | -0.129390 |
| 9                | 1                | 0              | 0.046628                | 4.076415  | 0.483652  |
| 10               | 6                | 0              | 2.376349                | -1.829277 | -1.466504 |
| 11               | 1                | 0              | 2.825764                | -2.677292 | -0.940228 |
| 12               | 1                | 0              | 1.454590                | -2.176113 | -1.942367 |
| 13               | 1                | 0              | 3.067632                | -1.557197 | -2.272827 |
| 14               | 6                | 0              | 3.257907                | 0.176698  | 1.209742  |
| 15               | 1                | 0              | 4.174366                | -0.420460 | 1.224093  |
| 16               | 1                | 0              | 3.548028                | 1.231754  | 1.170832  |
| 17               | 1                | 0              | 2.756689                | 0.024413  | 2.172233  |
| 18               | 6                | 0              | -0.558490               | -1.823146 | 1.630214  |
| 19               | 1                | 0              | -1.077668               | -2.486725 | 2.331559  |
| 20               | 1                | 0              | 0.152895                | -2.462887 | 1.091416  |
| 21               | 1                | 0              | 0.011781                | -1.108690 | 2.232128  |
| 22               | 6                | 0              | -2.903079               | -2.011998 | -0.866410 |
| 23               | 1                | 0              | -3.911040               | -1.598560 | -0.966955 |
| 24               | 1                | 0              | -2.455652               | -1.996135 | -1.867193 |
| 25               | 1                | 0              | -2.993696               | -3.061997 | -0.572847 |

Rotational constants (GHZ):      0.7890599      0.6182381      0.4253710  
Standard basis: 6-31G(d) (6D, 7F)

### TSMT, TS(5b,5c)

| Center<br>Number | Atomic<br>Number | Atomic<br>Type | Coordinates (Angstroms) |   |   |
|------------------|------------------|----------------|-------------------------|---|---|
|                  |                  |                | X                       | Y | Z |

|    |    |   |           |           |           |
|----|----|---|-----------|-----------|-----------|
| 1  | 13 | 0 | -0.839530 | -1.255996 | 0.101194  |
| 2  | 13 | 0 | -0.497539 | 1.389529  | -0.073754 |
| 3  | 13 | 0 | 1.602939  | -0.582866 | -0.115754 |
| 4  | 8  | 0 | 0.709768  | -1.699544 | 0.865045  |
| 5  | 8  | 0 | 0.120318  | -0.051514 | -1.029477 |
| 6  | 6  | 0 | 3.468117  | -0.263514 | -0.528144 |
| 7  | 1  | 0 | 3.884055  | -1.089913 | -1.112278 |
| 8  | 1  | 0 | 3.598973  | 0.653696  | -1.107910 |
| 9  | 1  | 0 | 4.063650  | -0.176307 | 0.384774  |
| 10 | 6  | 0 | -2.161129 | -2.511845 | -0.583797 |
| 11 | 1  | 0 | -2.967306 | -2.010538 | -1.128059 |
| 12 | 1  | 0 | -1.694475 | -3.224234 | -1.271313 |
| 13 | 1  | 0 | -2.622188 | -3.097229 | 0.218454  |
| 14 | 6  | 0 | -1.857589 | 0.248853  | 1.193637  |
| 15 | 1  | 0 | -2.885727 | 0.322547  | 0.826186  |
| 16 | 1  | 0 | -1.854216 | -0.531691 | 1.972145  |
| 17 | 1  | 0 | -1.679177 | 1.139227  | 1.814563  |
| 18 | 6  | 0 | 1.061345  | 1.891070  | 1.078533  |
| 19 | 1  | 0 | 1.855622  | 2.412462  | 0.531449  |
| 20 | 1  | 0 | 0.685113  | 2.614169  | 1.814719  |
| 21 | 1  | 0 | 1.544885  | 1.123890  | 1.702795  |
| 22 | 6  | 0 | -1.601081 | 2.742833  | -0.953372 |
| 23 | 1  | 0 | -1.006813 | 3.363009  | -1.632773 |
| 24 | 1  | 0 | -2.396391 | 2.284845  | -1.550405 |
| 25 | 1  | 0 | -2.080978 | 3.421481  | -0.239952 |

-----  
Rotational constants (GHZ):           0.9470907           0.8560931           0.5520116  
Standard basis: 6-31G(d) (6D, 7F)

### ATS(5c)

| Center<br>Number | Atomic<br>Number | Atomic<br>Type | Coordinates (Angstroms) |           |           |
|------------------|------------------|----------------|-------------------------|-----------|-----------|
|                  |                  |                | X                       | Y         | Z         |
| 1                | 13               | 0              | -1.079942               | 1.524084  | -0.007159 |
| 2                | 13               | 0              | 1.762134                | -0.403376 | 0.004471  |
| 3                | 13               | 0              | -1.696318               | -0.895579 | -0.011580 |
| 4                | 8                | 0              | -2.585775               | 0.620744  | 0.009370  |
| 5                | 8                | 0              | -0.139698               | -0.005635 | -0.034318 |
| 6                | 6                | 0              | -2.143785               | -2.773189 | -0.001928 |
| 7                | 1                | 0              | -1.624536               | -3.296746 | -0.808637 |
| 8                | 1                | 0              | -1.828596               | -3.235850 | 0.937479  |
| 9                | 1                | 0              | -3.219387               | -2.924993 | -0.117693 |
| 10               | 6                | 0              | -0.525668               | 3.372861  | -0.002221 |
| 11               | 1                | 0              | 0.160166                | 3.559505  | 0.828744  |
| 12               | 1                | 0              | 0.010153                | 3.612108  | -0.925025 |
| 13               | 1                | 0              | -1.377779               | 4.050083  | 0.089434  |
| 14               | 6                | 0              | 2.298820                | 0.389828  | 1.753323  |
| 15               | 1                | 0              | 2.114641                | 1.471298  | 1.810595  |
| 16               | 1                | 0              | 1.776648                | -0.067817 | 2.603194  |
| 17               | 1                | 0              | 3.370296                | 0.258740  | 1.947626  |
| 18               | 6                | 0              | 1.744352                | -2.395274 | -0.092064 |
| 19               | 1                | 0              | 1.278335                | -2.774339 | -1.011164 |
| 20               | 1                | 0              | 2.760226                | -2.808561 | -0.078119 |
| 21               | 1                | 0              | 1.218780                | -2.862584 | 0.751227  |
| 22               | 6                | 0              | 2.408178                | 0.556642  | -1.618281 |

|    |   |   |          |          |           |
|----|---|---|----------|----------|-----------|
| 23 | 1 | 0 | 1.938814 | 0.189323 | -2.539652 |
| 24 | 1 | 0 | 2.228776 | 1.639545 | -1.577861 |
| 25 | 1 | 0 | 3.489505 | 0.437534 | -1.758061 |

-----  
 Rotational constants (GHZ):       0.8454027       0.7249727       0.4609456  
 Standard basis: 6-31G(d) (6D, 7F)

**(MeAlO)<sub>2</sub>, Cyclodialuminoxane, 7**

| Center<br>Number | Atomic<br>Number | Atomic<br>Type | Coordinates (Angstroms) |           |           |
|------------------|------------------|----------------|-------------------------|-----------|-----------|
|                  |                  |                | X                       | Y         | Z         |
| 1                | 13               | 0              | 0.000000                | 1.212085  | 0.000000  |
| 2                | 13               | 0              | 0.000000                | -1.212085 | 0.000000  |
| 3                | 8                | 0              | 0.000000                | 0.000000  | -1.286748 |
| 4                | 8                | 0              | 0.000000                | 0.000000  | 1.286748  |
| 5                | 6                | 0              | -0.018824               | 3.153646  | 0.000000  |
| 6                | 1                | 0              | 0.477996                | 3.555094  | 0.886725  |
| 7                | 1                | 0              | 0.477996                | 3.555094  | -0.886725 |
| 8                | 1                | 0              | -1.045916               | 3.530749  | 0.000000  |
| 9                | 6                | 0              | 0.018824                | -3.153646 | 0.000000  |
| 10               | 1                | 0              | -0.477996               | -3.555094 | -0.886725 |
| 11               | 1                | 0              | -0.477996               | -3.555094 | 0.886725  |
| 12               | 1                | 0              | 1.045916                | -3.530749 | 0.000000  |

-----  
 Rotational constants (GHZ):       8.5281474       1.2724059       1.1225766  
 Standard basis: 6-31G(d) (6D, 7F)

**Iron Complexes Calculated at B3LYP/6-31G\***

**L(Me)<sub>2</sub>FeCl<sub>2</sub>, C<sub>2v</sub>**

| Center<br>Number | Atomic<br>Number | Atomic<br>Type | Coordinates (Angstroms) |           |           |
|------------------|------------------|----------------|-------------------------|-----------|-----------|
|                  |                  |                | X                       | Y         | Z         |
| 1                | 26               | 0              | 0.774939                | 0.000067  | 0.000110  |
| 2                | 7                | 0              | 0.506709                | 1.935042  | -0.000337 |
| 3                | 17               | 0              | 1.566283                | 0.000699  | 2.098195  |
| 4                | 7                | 0              | -1.021149               | -0.000001 | 0.000003  |
| 5                | 7                | 0              | 0.506891                | -1.934989 | 0.000342  |
| 6                | 6                | 0              | -0.741588               | 2.286444  | -0.000555 |
| 7                | 6                | 0              | -3.082798               | 1.211766  | -0.000400 |
| 8                | 1                | 0              | -3.609853               | 2.160616  | -0.000744 |
| 9                | 6                | 0              | -1.688585               | -1.189093 | 0.000328  |
| 10               | 6                | 0              | -1.688705               | 1.189028  | -0.000358 |
| 11               | 6                | 0              | -0.741396               | -2.286431 | 0.000439  |
| 12               | 6                | 0              | -3.780879               | -0.000145 | -0.000063 |
| 13               | 1                | 0              | -4.865968               | -0.000195 | -0.000091 |
| 14               | 6                | 0              | -3.082676               | -1.211985 | 0.000327  |
| 15               | 1                | 0              | -3.609625               | -2.160893 | 0.000620  |
| 16               | 1                | 0              | -1.059833               | -3.328878 | 0.000513  |
| 17               | 1                | 0              | -1.060082               | 3.328870  | -0.000767 |
| 18               | 17               | 0              | 1.566445                | -0.000672 | -2.097950 |
| 19               | 6                | 0              | 1.556402                | 2.940343  | -0.000415 |
| 20               | 1                | 0              | 2.177709                | 2.787131  | -0.888297 |

|    |   |   |          |           |           |
|----|---|---|----------|-----------|-----------|
| 21 | 1 | 0 | 1.151739 | 3.959310  | -0.000343 |
| 22 | 1 | 0 | 2.177946 | 2.787062  | 0.887283  |
| 23 | 6 | 0 | 1.556570 | -2.940303 | -0.000078 |
| 24 | 1 | 0 | 2.178580 | -2.786861 | 0.887270  |
| 25 | 1 | 0 | 1.151903 | -3.959254 | 0.000400  |
| 26 | 1 | 0 | 2.177461 | -2.787191 | -0.888277 |

Rotational constants (GHZ): 0.5537204 0.4389644 0.3504898  
Standard basis: 6-31G(d) (6D, 7F)

### [L(Me)<sub>2</sub>FeCl]<sup>+</sup>, C<sub>s</sub>

| Center Number | Atomic Number | Atomic Type | Coordinates (Angstroms) |           |           |
|---------------|---------------|-------------|-------------------------|-----------|-----------|
|               |               |             | X                       | Y         | Z         |
| 1             | 26            | 0           | -0.885599               | -0.000005 | -0.379101 |
| 2             | 7             | 0           | -0.606349               | 1.954988  | -0.351570 |
| 3             | 17            | 0           | -2.419063               | 0.000000  | 1.137972  |
| 4             | 7             | 0           | 0.937122                | 0.000001  | -0.075791 |
| 5             | 7             | 0           | -0.606341               | -1.954990 | -0.351565 |
| 6             | 6             | 0           | 0.621652                | 2.292553  | -0.132296 |
| 7             | 6             | 0           | 2.953269                | 1.217446  | 0.243064  |
| 8             | 1             | 0           | 3.478471                | 2.162987  | 0.326176  |
| 9             | 6             | 0           | 1.576415                | -1.183474 | 0.020588  |
| 10            | 6             | 0           | 1.576410                | 1.183479  | 0.020584  |
| 11            | 6             | 0           | 0.621661                | -2.292551 | -0.132291 |
| 12            | 6             | 0           | 3.635881                | 0.000008  | 0.356270  |
| 13            | 1             | 0           | 4.706774                | 0.000010  | 0.531603  |
| 14            | 6             | 0           | 2.953274                | -1.217434 | 0.243067  |
| 15            | 1             | 0           | 3.478481                | -2.162973 | 0.326180  |
| 16            | 1             | 0           | 0.940444                | -3.331450 | -0.048939 |
| 17            | 1             | 0           | 0.940430                | 3.331453  | -0.048944 |
| 18            | 6             | 0           | -1.635761               | 2.984234  | -0.479346 |
| 19            | 6             | 0           | -1.635747               | -2.984241 | -0.479349 |
| 20            | 1             | 0           | -2.127998               | -2.874799 | -1.451576 |
| 21            | 1             | 0           | -2.385565               | 2.811481  | 0.297986  |
| 22            | 1             | 0           | -1.220590               | -3.992462 | -0.388538 |
| 23            | 1             | 0           | -2.385552               | -2.811497 | 0.297985  |
| 24            | 1             | 0           | -1.220609               | 3.992457  | -0.388529 |
| 25            | 1             | 0           | -2.128011               | 2.874796  | -1.451574 |

Rotational constants (GHZ): 0.7394821 0.5523166 0.3469014  
Standard basis: 6-31G(d) (6D, 7F)

### L(Ph)<sub>2</sub>FeCl<sub>2</sub>, C<sub>1</sub>

| Center Number | Atomic Number | Atomic Type | Coordinates (Angstroms) |           |           |
|---------------|---------------|-------------|-------------------------|-----------|-----------|
|               |               |             | X                       | Y         | Z         |
| 1             | 26            | 0           | 0.000126                | 0.047030  | 0.001315  |
| 2             | 7             | 0           | -1.958878               | 0.315983  | -0.170750 |
| 3             | 17            | 0           | 0.270044                | -0.612602 | -2.129522 |
| 4             | 7             | 0           | 0.000069                | 1.840653  | 0.000684  |
| 5             | 7             | 0           | 1.959061                | 0.316149  | 0.170877  |
| 6             | 6             | 0           | -2.790651               | -1.862437 | -0.854387 |
| 7             | 6             | 0           | -2.281935               | 1.579506  | -0.208922 |



|    |    |   |           |           |           |
|----|----|---|-----------|-----------|-----------|
| 8  | 6  | 0 | -1.204055 | 3.904550  | -0.124870 |
| 9  | 1  | 0 | -2.148885 | 4.429817  | -0.221706 |
| 10 | 6  | 0 | 1.181763  | 2.508959  | 0.118799  |
| 11 | 6  | 0 | -2.981959 | -0.669476 | -0.143982 |
| 12 | 6  | 0 | 2.981886  | -0.669485 | 0.143257  |
| 13 | 6  | 0 | -1.181557 | 2.508887  | -0.118578 |
| 14 | 6  | 0 | 2.282239  | 1.579674  | 0.208569  |
| 15 | 6  | 0 | -4.154634 | -0.479576 | 0.603343  |
| 16 | 6  | 0 | 4.154092  | -0.479792 | -0.604767 |
| 17 | 6  | 0 | 0.000126  | 4.603368  | -0.000845 |
| 18 | 1  | 0 | 0.000108  | 5.688445  | -0.001409 |
| 19 | 6  | 0 | -5.138937 | -1.465062 | 0.613317  |
| 20 | 1  | 0 | -6.037753 | -1.318474 | 1.205826  |
| 21 | 6  | 0 | 1.204272  | 3.904667  | 0.123711  |
| 22 | 1  | 0 | 2.149168  | 4.429966  | 0.219740  |
| 23 | 6  | 0 | -3.786289 | -2.836482 | -0.844236 |
| 24 | 1  | 0 | -3.639631 | -3.752775 | -1.409044 |
| 25 | 6  | 0 | 5.138177  | -1.465521 | -0.615462 |
| 26 | 1  | 0 | 6.036638  | -1.319073 | -1.208542 |
| 27 | 6  | 0 | 2.790864  | -1.862406 | 0.853871  |
| 28 | 6  | 0 | -4.961809 | -2.643156 | -0.115126 |
| 29 | 6  | 0 | 4.961275  | -2.643609 | 0.113001  |
| 30 | 1  | 0 | 5.728994  | -3.412196 | 0.100324  |
| 31 | 6  | 0 | 3.786204  | -2.836700 | 0.842949  |
| 32 | 1  | 0 | 3.639715  | -3.752965 | 1.407839  |
| 33 | 1  | 0 | 1.883189  | -1.993268 | 1.432799  |
| 34 | 1  | 0 | 4.268846  | 0.412335  | -1.213045 |
| 35 | 1  | 0 | 3.313134  | 1.916707  | 0.297859  |
| 36 | 1  | 0 | -4.269475 | 0.412525  | 1.211632  |
| 37 | 1  | 0 | -5.729720 | -3.411568 | -0.103098 |
| 38 | 1  | 0 | -1.882580 | -1.993523 | -1.432617 |
| 39 | 1  | 0 | -3.312696 | 1.916592  | -0.299603 |
| 40 | 17 | 0 | -0.269956 | -0.613296 | 2.131600  |

-----  
Rotational constants (GHZ):      0.2591002      0.1523043      0.1124670  
Standard basis: 6-31G(d) (6D, 7F)

### L(Ph)<sub>2</sub>FeCl<sub>2</sub>, C<sub>s</sub>

| Center<br>Number | Atomic<br>Number | Atomic<br>Type | Coordinates (Angstroms) |           |           |
|------------------|------------------|----------------|-------------------------|-----------|-----------|
|                  |                  |                | X                       | Y         | Z         |
| 1                | 26               | 0              | -0.000042               | 0.053592  | 0.118585  |
| 2                | 7                | 0              | 1.963849                | 0.321246  | 0.060327  |
| 3                | 17               | 0              | 0.000199                | -0.415840 | 2.324859  |
| 4                | 7                | 0              | -0.000022               | 1.846214  | 0.052075  |
| 5                | 7                | 0              | -1.963928               | 0.321404  | 0.060296  |
| 6                | 6                | 0              | 2.869382                | -1.832032 | 0.727458  |
| 7                | 6                | 0              | 2.291002                | 1.584059  | 0.032941  |
| 8                | 6                | 0              | 1.210671                | 3.910078  | 0.020027  |
| 9                | 1                | 0              | 2.160430                | 4.435310  | 0.011220  |
| 10               | 6                | 0              | -1.187762               | 2.514625  | 0.038244  |
| 11               | 6                | 0              | 2.976986                | -0.668761 | -0.046426 |
| 12               | 6                | 0              | -2.977024               | -0.668659 | -0.046408 |
| 13               | 6                | 0              | 1.187767                | 2.514510  | 0.038225  |
| 14               | 6                | 0              | -2.291058               | 1.584195  | 0.032910  |

|    |    |   |           |           |           |
|----|----|---|-----------|-----------|-----------|
| 15 | 6  | 0 | 4.054674  | -0.512283 | -0.930822 |
| 16 | 6  | 0 | -4.054465 | -0.512465 | -0.931135 |
| 17 | 6  | 0 | 0.000109  | 4.608823  | 0.012229  |
| 18 | 1  | 0 | 0.000134  | 5.693810  | -0.001717 |
| 19 | 6  | 0 | 5.031153  | -1.502075 | -1.017232 |
| 20 | 1  | 0 | 5.855219  | -1.382391 | -1.715082 |
| 21 | 6  | 0 | -1.210537 | 3.910167  | 0.020051  |
| 22 | 1  | 0 | -2.160233 | 4.435512  | 0.011290  |
| 23 | 6  | 0 | 3.857285  | -2.809830 | 0.640379  |
| 24 | 1  | 0 | 3.777677  | -3.703094 | 1.253436  |
| 25 | 6  | 0 | -5.030918 | -1.502301 | -1.017493 |
| 26 | 1  | 0 | -5.854795 | -1.382850 | -1.715604 |
| 27 | 6  | 0 | -2.869594 | -1.831662 | 0.727901  |
| 28 | 6  | 0 | 4.939805  | -2.650151 | -0.227946 |
| 29 | 6  | 0 | -4.939764 | -2.650105 | -0.227800 |
| 30 | 1  | 0 | -5.700748 | -3.422159 | -0.299162 |
| 31 | 6  | 0 | -3.857476 | -2.809488 | 0.640875  |
| 32 | 1  | 0 | -3.778053 | -3.702546 | 1.254257  |
| 33 | 1  | 0 | -2.034507 | -1.935831 | 1.412003  |
| 34 | 1  | 0 | -4.097218 | 0.355760  | -1.581901 |
| 35 | 1  | 0 | -3.326278 | 1.918756  | 0.004993  |
| 36 | 1  | 0 | 4.097603  | 0.356117  | -1.581342 |
| 37 | 1  | 0 | 5.700830  | -3.422158 | -0.299369 |
| 38 | 1  | 0 | 2.034137  | -1.936420 | 1.411330  |
| 39 | 1  | 0 | 3.326230  | 1.918593  | 0.005155  |
| 40 | 17 | 0 | -0.000201 | -0.825435 | -1.935298 |

-----  
Rotational constants (GHZ):           0.2558028           0.1529561           0.1132552  
Standard basis: 6-31G(d) (6D, 7F)

**[L(Ph)<sub>2</sub>FeCl]<sup>+</sup>, disrot. I, C<sub>s</sub>**

| Center<br>Number | Atomic<br>Number | Atomic<br>Type | Coordinates (Angstroms) |           |           |
|------------------|------------------|----------------|-------------------------|-----------|-----------|
|                  |                  |                | X                       | Y         | Z         |
| 1                | 26               | 0              | 0.000000                | -0.283216 | -0.619730 |
| 2                | 7                | 0              | -1.755874               | -0.370641 | 0.182598  |
| 3                | 17               | 0              | -0.000002               | 0.942776  | -2.357838 |
| 4                | 7                | 0              | 0.000000                | -2.031724 | -0.087695 |
| 5                | 7                | 0              | 1.755873                | -0.370641 | 0.182598  |
| 6                | 6                | 0              | -2.209735               | -1.605178 | 0.256978  |
| 7                | 6                | 0              | -1.216911               | -3.978482 | 0.532961  |
| 8                | 1                | 0              | -2.159061               | -4.477506 | 0.734286  |
| 9                | 6                | 0              | 1.186216                | -2.622689 | 0.191893  |
| 10               | 6                | 0              | -1.186216               | -2.622689 | 0.191894  |
| 11               | 6                | 0              | 2.209734                | -1.605179 | 0.256976  |
| 12               | 6                | 0              | 0.000000                | -4.660763 | 0.657750  |
| 13               | 1                | 0              | 0.000000                | -5.713402 | 0.919951  |
| 14               | 6                | 0              | 1.216911                | -3.978482 | 0.532960  |
| 15               | 1                | 0              | 2.159061                | -4.477506 | 0.734283  |
| 16               | 1                | 0              | 3.259458                | -1.822840 | 0.433419  |
| 17               | 1                | 0              | -3.259458               | -1.822841 | 0.433424  |
| 18               | 6                | 0              | -2.638332               | 0.742489  | 0.289805  |
| 19               | 6                | 0              | -2.187839               | 1.875465  | 0.978800  |
| 20               | 6                | 0              | -3.919622               | 0.720757  | -0.280055 |
| 21               | 6                | 0              | -3.032134               | 2.971730  | 1.127642  |

|    |   |   |           |           |           |
|----|---|---|-----------|-----------|-----------|
| 22 | 1 | 0 | -1.194537 | 1.879169  | 1.416767  |
| 23 | 6 | 0 | -4.752090 | 1.827586  | -0.134787 |
| 24 | 1 | 0 | -4.243820 | -0.132571 | -0.868345 |
| 25 | 6 | 0 | -4.314298 | 2.950328  | 0.572187  |
| 26 | 1 | 0 | -2.688723 | 3.844448  | 1.674138  |
| 27 | 1 | 0 | -5.738595 | 1.818066  | -0.587593 |
| 28 | 1 | 0 | -4.965936 | 3.811986  | 0.678396  |
| 29 | 6 | 0 | 2.638332  | 0.742487  | 0.289806  |
| 30 | 6 | 0 | 2.187845  | 1.875459  | 0.978813  |
| 31 | 6 | 0 | 3.919617  | 0.720759  | -0.280064 |
| 32 | 6 | 0 | 3.032142  | 2.971723  | 1.127655  |
| 33 | 1 | 0 | 1.194547  | 1.879160  | 1.416789  |
| 34 | 6 | 0 | 4.752087  | 1.827586  | -0.134797 |
| 35 | 1 | 0 | 4.243810  | -0.132566 | -0.868362 |
| 36 | 6 | 0 | 4.314301  | 2.950324  | 0.572188  |
| 37 | 1 | 0 | 2.688736  | 3.844437  | 1.674159  |
| 38 | 1 | 0 | 5.738588  | 1.818069  | -0.587611 |
| 39 | 1 | 0 | 4.965940  | 3.811981  | 0.678397  |

-----  
Rotational constants (GHZ):      0.2476709      0.1910491      0.1244089  
Standard basis: 6-31G(d) (6D, 7F)

**[L(Ph)<sub>2</sub>FeCl]<sup>+</sup>, disrot. II, C<sub>s</sub>**

| Center<br>Number | Atomic<br>Number | Atomic<br>Type | Coordinates (Angstroms) |           |           |
|------------------|------------------|----------------|-------------------------|-----------|-----------|
|                  |                  |                | X                       | Y         | Z         |
| 1                | 26               | 0              | 0.000123                | 0.018748  | 0.077896  |
| 2                | 7                | 0              | 1.961725                | 0.274338  | -0.089669 |
| 3                | 17               | 0              | -0.000051               | -0.389165 | 2.212889  |
| 4                | 7                | 0              | 0.000136                | 1.837653  | -0.110924 |
| 5                | 7                | 0              | -1.961582               | 0.274370  | -0.090039 |
| 6                | 6                | 0              | 2.686405                | -1.981609 | 0.381028  |
| 7                | 6                | 0              | 2.292892                | 1.535126  | -0.120740 |
| 8                | 6                | 0              | 1.216114                | 3.882037  | -0.094911 |
| 9                | 1                | 0              | 2.162138                | 4.412782  | -0.087806 |
| 10               | 6                | 0              | -1.185457               | 2.485097  | -0.102605 |
| 11               | 6                | 0              | 2.929264                | -0.749886 | -0.247899 |
| 12               | 6                | 0              | -2.929323               | -0.749741 | -0.248078 |
| 13               | 6                | 0              | 1.185765                | 2.485056  | -0.102162 |
| 14               | 6                | 0              | -2.292625               | 1.535177  | -0.121319 |
| 15               | 6                | 0              | 4.078768                | -0.575374 | -1.038841 |
| 16               | 6                | 0              | -2.686624               | -1.981386 | 0.381035  |
| 17               | 6                | 0              | 0.000184                | 4.574102  | -0.090748 |
| 18               | 1                | 0              | 0.000192                | 5.659133  | -0.082217 |
| 19               | 6                | 0              | 4.986821                | -1.620515 | -1.170621 |
| 20               | 1                | 0              | 5.867454                | -1.490064 | -1.791935 |
| 21               | 6                | 0              | -1.215777               | 3.882068  | -0.095407 |
| 22               | 1                | 0              | -2.161779               | 4.412856  | -0.088735 |
| 23               | 6                | 0              | 3.609051                | -3.016208 | 0.249843  |
| 24               | 1                | 0              | 3.430848                | -3.959775 | 0.756053  |
| 25               | 6                | 0              | -3.609473               | -3.015844 | 0.250125  |
| 26               | 1                | 0              | -3.431378               | -3.959360 | 0.756469  |
| 27               | 6                | 0              | -4.078888               | -0.575150 | -1.038908 |
| 28               | 6                | 0              | 4.758862                | -2.839470 | -0.522853 |
| 29               | 6                | 0              | -4.759354               | -2.839027 | -0.522445 |

|    |   |   |           |           |           |
|----|---|---|-----------|-----------|-----------|
| 30 | 1 | 0 | -5.472412 | -3.650595 | -0.629823 |
| 31 | 6 | 0 | -4.987167 | -1.620135 | -1.170386 |
| 32 | 1 | 0 | -5.867846 | -1.489619 | -1.791621 |
| 33 | 1 | 0 | -4.237470 | 0.351397  | -1.582663 |
| 34 | 1 | 0 | -1.814335 | -2.093628 | 1.016227  |
| 35 | 1 | 0 | -3.326825 | 1.869305  | -0.166333 |
| 36 | 1 | 0 | 4.237441  | 0.351267  | -1.582415 |
| 37 | 1 | 0 | 5.471760  | -3.651147 | -0.630471 |
| 38 | 1 | 0 | 1.814165  | -2.093778 | 1.016302  |
| 39 | 1 | 0 | 3.327129  | 1.869161  | -0.165650 |

-----  
 Rotational constants (GHZ):      0.2697574      0.1671828      0.1154883  
 Standard basis: 6-31G(d) (6D, 7F)

**[L(Ph)<sub>2</sub>FeCl]<sup>+</sup>, conrot., III, C<sub>1</sub>**

| Center<br>Number | Atomic<br>Number | Atomic<br>Type | Coordinates (Angstroms) |           |           |
|------------------|------------------|----------------|-------------------------|-----------|-----------|
|                  |                  |                | X                       | Y         | Z         |
| 1                | 26               | 0              | 0.004115                | 0.028981  | -0.002811 |
| 2                | 7                | 0              | 1.958696                | 0.299383  | -0.250667 |
| 3                | 17               | 0              | 0.200577                | -0.521416 | 2.085986  |
| 4                | 7                | 0              | -0.008717               | 1.853672  | -0.163721 |
| 5                | 7                | 0              | -1.963575               | 0.284739  | -0.018507 |
| 6                | 6                | 0              | 4.244579                | -0.580403 | 0.142901  |
| 7                | 6                | 0              | 2.283201                | 1.558824  | -0.309597 |
| 8                | 6                | 0              | 1.199106                | 3.901174  | -0.245140 |
| 9                | 1                | 0              | 2.141587                | 4.434728  | -0.306376 |
| 10               | 6                | 0              | -1.192648               | 2.498134  | -0.079917 |
| 11               | 6                | 0              | 2.922286                | -0.735123 | -0.301392 |
| 12               | 6                | 0              | -2.947303               | -0.733224 | -0.117347 |
| 13               | 6                | 0              | 1.172645                | 2.504846  | -0.238050 |
| 14               | 6                | 0              | -2.296783               | 1.545719  | -0.025662 |
| 15               | 6                | 0              | 2.491776                | -1.968430 | -0.811020 |
| 16               | 6                | 0              | -2.694656               | -1.958526 | 0.520578  |
| 17               | 6                | 0              | -0.016412               | 4.590426  | -0.162130 |
| 18               | 1                | 0              | -0.018995               | 5.675503  | -0.161792 |
| 19               | 6                | 0              | 3.385845                | -3.027552 | -0.924522 |
| 20               | 1                | 0              | 3.051997                | -3.975340 | -1.334615 |
| 21               | 6                | 0              | -1.227138               | 3.895455  | -0.078617 |
| 22               | 1                | 0              | -2.172308               | 4.423604  | -0.012126 |
| 23               | 6                | 0              | 5.128490                | -1.650297 | 0.042831  |
| 24               | 1                | 0              | 6.147302                | -1.537713 | 0.400147  |
| 25               | 6                | 0              | -3.639480               | -2.979027 | 0.447530  |
| 26               | 1                | 0              | -3.453547               | -3.916997 | 0.961385  |
| 27               | 6                | 0              | -4.128682               | -0.552482 | -0.858922 |
| 28               | 6                | 0              | 4.706451                | -2.869851 | -0.496733 |
| 29               | 6                | 0              | -4.820180               | -2.796189 | -0.275699 |
| 30               | 1                | 0              | -5.549787               | -3.597781 | -0.337450 |
| 31               | 6                | 0              | -5.058128               | -1.584416 | -0.933106 |
| 32               | 1                | 0              | -5.963517               | -1.449433 | -1.516749 |
| 33               | 1                | 0              | -4.296377               | 0.368430  | -1.409609 |
| 34               | 1                | 0              | -1.795737               | -2.076195 | 1.116110  |
| 35               | 1                | 0              | -3.332346               | 1.877777  | -0.000845 |
| 36               | 1                | 0              | 1.462171                | -2.082757 | -1.143734 |
| 37               | 1                | 0              | 5.402125                | -3.700225 | -0.567129 |

|    |   |   |          |          |           |
|----|---|---|----------|----------|-----------|
| 38 | 1 | 0 | 4.568242 | 0.348138 | 0.602770  |
| 39 | 1 | 0 | 3.309725 | 1.899915 | -0.424310 |

-----  
 Rotational constants (GHZ):      0.2750528      0.1681839      0.1145757  
 Standard basis: 6-31G(d) (6D, 7F)

### Active Catalysts, Iron-MAO Adducts

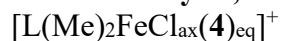

| Center<br>Number | Atomic<br>Number | Atomic<br>Type | Coordinates (Angstroms) |           |           |
|------------------|------------------|----------------|-------------------------|-----------|-----------|
|                  |                  |                | X                       | Y         | Z         |
| 1                | 26               | 0              | -0.196149               | -0.033089 | 0.257255  |
| 2                | 7                | 0              | -0.537726               | -2.003129 | 0.072849  |
| 3                | 17               | 0              | 0.072971                | 0.186466  | -2.078274 |
| 4                | 7                | 0              | -2.068849               | -0.010583 | 0.142455  |
| 5                | 7                | 0              | -0.511108               | 1.937861  | 0.446752  |
| 6                | 6                | 0              | -1.786903               | -2.292618 | -0.089896 |
| 7                | 6                | 0              | -4.106991               | -1.175994 | -0.271874 |
| 8                | 1                | 0              | -4.634750               | -2.107718 | -0.446637 |
| 9                | 6                | 0              | -2.708440               | 1.176537  | 0.147666  |
| 10               | 6                | 0              | -2.724393               | -1.168371 | -0.075690 |
| 11               | 6                | 0              | -1.755964               | 2.270351  | 0.345179  |
| 12               | 6                | 0              | -4.788366               | 0.045190  | -0.248431 |
| 13               | 1                | 0              | -5.862558               | 0.067048  | -0.399636 |
| 14               | 6                | 0              | -4.090445               | 1.239504  | -0.041707 |
| 15               | 1                | 0              | -4.605589               | 2.194410  | -0.036972 |
| 16               | 8                | 0              | 1.808418                | -0.035086 | 0.217392  |
| 17               | 6                | 0              | 0.245210                | -0.258142 | 2.689732  |
| 18               | 1                | 0              | 0.141380                | 0.569684  | 3.402696  |
| 19               | 1                | 0              | -0.698525               | -0.214833 | 2.105283  |
| 20               | 1                | 0              | 0.142694                | -1.189883 | 3.260928  |
| 21               | 6                | 0              | 3.145552                | 1.950414  | -1.876005 |
| 22               | 1                | 0              | 3.749771                | 2.337482  | -1.043218 |
| 23               | 1                | 0              | 3.814355                | 1.907326  | -2.745615 |
| 24               | 1                | 0              | 2.389896                | 2.711417  | -2.110522 |
| 25               | 1                | 0              | -2.089349               | 3.307494  | 0.389800  |
| 26               | 1                | 0              | -2.134721               | -3.314319 | -0.244924 |
| 27               | 13               | 0              | 2.075445                | -0.200696 | 1.906725  |
| 28               | 13               | 0              | 2.394154                | 0.163880  | -1.513946 |
| 29               | 6                | 0              | 3.211521                | -1.452204 | -2.281452 |
| 30               | 1                | 0              | 2.578803                | -2.348449 | -2.286753 |
| 31               | 1                | 0              | 3.485072                | -1.264142 | -3.328492 |
| 32               | 1                | 0              | 4.144347                | -1.720147 | -1.765119 |
| 33               | 6                | 0              | 3.761947                | -0.330183 | 2.864765  |
| 34               | 1                | 0              | 4.111918                | -1.370234 | 2.903636  |
| 35               | 1                | 0              | 4.549719                | 0.253651  | 2.374849  |
| 36               | 1                | 0              | 3.674846                | 0.018707  | 3.900258  |
| 37               | 6                | 0              | 0.484596                | 2.990149  | 0.630502  |
| 38               | 1                | 0              | 0.034098                | 3.987787  | 0.626507  |
| 39               | 1                | 0              | 0.996190                | 2.838499  | 1.587722  |
| 40               | 1                | 0              | 1.228139                | 2.916560  | -0.166528 |
| 41               | 6                | 0              | 0.441997                | -3.085334 | 0.047619  |
| 42               | 1                | 0              | 1.188741                | -2.865791 | -0.718821 |
| 43               | 1                | 0              | 0.952546                | -3.133777 | 1.016114  |
| 44               | 1                | 0              | -0.021944               | -4.055945 | -0.154636 |

-----  
Rotational constants (GHZ):       0.3509934       0.1895342       0.1881838  
Standard basis: 6-31G(d) (6D, 7F)

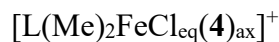

-----

| Center<br>Number | Atomic<br>Number | Atomic<br>Type | Coordinates (Angstroms) |           |           |
|------------------|------------------|----------------|-------------------------|-----------|-----------|
|                  |                  |                | X                       | Y         | Z         |
| 1                | 26               | 0              | -0.148937               | -0.917759 | 0.266990  |
| 2                | 7                | 0              | -0.530692               | -0.345193 | 2.146935  |
| 3                | 17               | 0              | 1.830842                | -2.085275 | 0.679962  |
| 4                | 7                | 0              | -1.890541               | -0.304810 | 0.035561  |
| 5                | 7                | 0              | -0.425338               | -1.471637 | -1.638798 |
| 6                | 6                | 0              | -1.715313               | 0.152157  | 2.296458  |
| 7                | 6                | 0              | -3.895848               | 0.576555  | 0.983494  |
| 8                | 1                | 0              | -4.432481               | 0.970144  | 1.840437  |
| 9                | 6                | 0              | -2.496381               | -0.481717 | -1.159153 |
| 10               | 6                | 0              | -2.562204               | 0.182093  | 1.101790  |
| 11               | 6                | 0              | -1.590326               | -1.147611 | -2.097854 |
| 12               | 6                | 0              | -4.523026               | 0.440238  | -0.259424 |
| 13               | 1                | 0              | -5.558445               | 0.741953  | -0.378148 |
| 14               | 6                | 0              | -3.827538               | -0.104510 | -1.344472 |
| 15               | 1                | 0              | -4.311346               | -0.243863 | -2.305641 |
| 16               | 8                | 0              | 0.926579                | 0.641358  | -0.182797 |
| 17               | 6                | 0              | 2.202617                | 3.373192  | -1.098515 |
| 18               | 1                | 0              | 2.625585                | 3.886281  | -0.224164 |
| 19               | 1                | 0              | 3.010795                | 2.786469  | -1.548918 |
| 20               | 1                | 0              | 1.925293                | 4.156593  | -1.815377 |
| 21               | 6                | 0              | 3.595362                | -0.250496 | -1.737034 |
| 22               | 1                | 0              | 4.550368                | 0.291366  | -1.755512 |
| 23               | 1                | 0              | 3.839624                | -1.307492 | -1.904481 |
| 24               | 1                | 0              | 3.028223                | 0.095634  | -2.611965 |
| 25               | 1                | 0              | -1.904704               | -1.382385 | -3.115287 |
| 26               | 1                | 0              | -2.085658               | 0.503373  | 3.260143  |
| 27               | 13               | 0              | 0.626090                | 2.326783  | -0.601833 |
| 28               | 13               | 0              | 2.685504                | 0.036196  | -0.011236 |
| 29               | 6                | 0              | 3.614949                | 0.827093  | 1.533645  |
| 30               | 1                | 0              | 2.967574                | 1.224768  | 2.326281  |
| 31               | 1                | 0              | 4.278410                | 0.090258  | 2.005618  |
| 32               | 1                | 0              | 4.257115                | 1.657503  | 1.210468  |
| 33               | 6                | 0              | -1.199448               | 3.040699  | -0.519172 |
| 34               | 1                | 0              | -1.917035               | 2.486638  | -1.136429 |
| 35               | 1                | 0              | -1.595840               | 3.051506  | 0.504462  |
| 36               | 1                | 0              | -1.205235               | 4.078901  | -0.872078 |
| 37               | 6                | 0              | 0.505152                | -2.186495 | -2.511731 |
| 38               | 1                | 0              | 0.072672                | -2.374218 | -3.499682 |
| 39               | 1                | 0              | 1.420651                | -1.598232 | -2.611706 |
| 40               | 1                | 0              | 0.776387                | -3.133841 | -2.037326 |
| 41               | 6                | 0              | 0.344991                | -0.453316 | 3.313084  |
| 42               | 1                | 0              | 1.275726                | 0.080793  | 3.107731  |
| 43               | 1                | 0              | -0.126896               | -0.050667 | 4.214972  |
| 44               | 1                | 0              | 0.601993                | -1.505486 | 3.465220  |

-----

Rotational constants (GHZ):       0.3244497       0.1993401       0.1914118  
Standard basis: 6-31G(d) (6D, 7F)

[L(Me)<sub>2</sub>FeCl<sub>ax</sub>(7)<sub>eq</sub>]<sup>+</sup>

| Center Number | Atomic Number | Atomic Type | Coordinates (Angstroms) |           |           |
|---------------|---------------|-------------|-------------------------|-----------|-----------|
|               |               |             | X                       | Y         | Z         |
| 1             | 26            | 0           | -0.247028               | -0.016463 | -0.349585 |
| 2             | 7             | 0           | -0.781920               | 1.794831  | -0.989994 |
| 3             | 17            | 0           | 0.226437                | 0.555337  | 1.869272  |
| 4             | 7             | 0           | -2.099910               | -0.174361 | -0.171668 |
| 5             | 7             | 0           | -0.369039               | -1.953948 | 0.204751  |
| 6             | 6             | 0           | -2.058866               | 2.000585  | -0.949019 |
| 7             | 6             | 0           | -4.264221               | 0.822225  | -0.311518 |
| 8             | 1             | 0           | -4.886781               | 1.680989  | -0.540095 |
| 9             | 6             | 0           | -2.632951               | -1.342803 | 0.243852  |
| 10            | 6             | 0           | -2.878078               | 0.891697  | -0.459370 |
| 11            | 6             | 0           | -1.580078               | -2.332885 | 0.459765  |
| 12            | 6             | 0           | -4.828107               | -0.377883 | 0.134876  |
| 13            | 1             | 0           | -5.902908               | -0.455930 | 0.260567  |
| 14            | 6             | 0           | -4.012250               | -1.479035 | 0.413128  |
| 15            | 1             | 0           | -4.436639               | -2.418332 | 0.752082  |
| 16            | 8             | 0           | 1.626630                | 0.184035  | -0.728525 |
| 17            | 13            | 0           | 3.051887                | -0.903004 | -0.648741 |
| 18            | 8             | 0           | 3.506704                | -0.317864 | 0.904433  |
| 19            | 6             | 0           | 3.715387                | -2.171094 | -1.958963 |
| 20            | 1             | 0           | 2.946893                | -2.485246 | -2.673742 |
| 21            | 1             | 0           | 4.531560                | -1.719476 | -2.536487 |
| 22            | 1             | 0           | 4.125664                | -3.064030 | -1.473849 |
| 23            | 13            | 0           | 2.296626                | 0.969252  | 0.884495  |
| 24            | 6             | 0           | 2.746297                | 2.847822  | 1.153142  |
| 25            | 1             | 0           | 1.885175                | 3.502465  | 1.328075  |
| 26            | 1             | 0           | 3.394882                | 2.932194  | 2.034726  |
| 27            | 1             | 0           | 3.317413                | 3.253267  | 0.308189  |
| 28            | 1             | 0           | -1.813012               | -3.332119 | 0.828576  |
| 29            | 1             | 0           | -2.511267               | 2.934894  | -1.282168 |
| 30            | 6             | 0           | 0.088821                | 2.843057  | -1.520607 |
| 31            | 1             | 0           | -0.485900               | 3.680671  | -1.928092 |
| 32            | 1             | 0           | 0.741672                | 3.203372  | -0.721023 |
| 33            | 1             | 0           | 0.724582                | 2.411145  | -2.297275 |
| 34            | 6             | 0           | 0.717797                | -2.899142 | 0.451683  |
| 35            | 1             | 0           | 1.234450                | -3.112918 | -0.491527 |
| 36            | 1             | 0           | 1.424617                | -2.449663 | 1.158801  |
| 37            | 1             | 0           | 0.359127                | -3.845505 | 0.869324  |

Rotational constants (GHZ):      0.4289178      0.2070700      0.1727672  
 Standard basis: 6-31G(d) (6D, 7F)

[L(Me)<sub>2</sub>FeCl<sub>eq</sub>(7)<sub>ax</sub>]<sup>+</sup>

| Center Number | Atomic Number | Atomic Type | Coordinates (Angstroms) |          |           |
|---------------|---------------|-------------|-------------------------|----------|-----------|
|               |               |             | X                       | Y        | Z         |
| 1             | 26            | 0           | -0.061419               | 0.506797 | 0.699769  |
| 2             | 7             | 0           | -0.305304               | 2.328528 | -0.088365 |
| 3             | 17            | 0           | 2.128451                | 0.732464 | 1.610955  |
| 4             | 7             | 0           | -1.819011               | 0.339818 | 0.148061  |

|    |    |   |           |           |           |
|----|----|---|-----------|-----------|-----------|
| 5  | 7  | 0 | -0.461698 | -1.291310 | 1.493361  |
| 6  | 6  | 0 | -1.459900 | 2.480613  | -0.648496 |
| 7  | 6  | 0 | -3.698763 | 1.242525  | -1.007179 |
| 8  | 1  | 0 | -4.155252 | 2.054588  | -1.563423 |
| 9  | 6  | 0 | -2.495463 | -0.794969 | 0.431489  |
| 10 | 6  | 0 | -2.387114 | 1.351088  | -0.542185 |
| 11 | 6  | 0 | -1.667360 | -1.694922 | 1.235380  |
| 12 | 6  | 0 | -4.408423 | 0.067694  | -0.734631 |
| 13 | 1  | 0 | -5.429446 | -0.039818 | -1.085515 |
| 14 | 6  | 0 | -3.811944 | -0.964277 | -0.002453 |
| 15 | 1  | 0 | -4.356647 | -1.874073 | 0.227581  |
| 16 | 8  | 0 | 0.762887  | -0.158594 | -0.900550 |
| 17 | 13 | 0 | 1.080422  | -1.892115 | -1.247211 |
| 18 | 8  | 0 | 2.722535  | -1.761401 | -0.756372 |
| 19 | 6  | 0 | -0.099860 | -3.275135 | -1.929586 |
| 20 | 1  | 0 | -1.137445 | -2.937469 | -2.022739 |
| 21 | 1  | 0 | 0.234795  | -3.591579 | -2.925016 |
| 22 | 1  | 0 | -0.078756 | -4.167337 | -1.292885 |
| 23 | 13 | 0 | 2.626531  | -0.004832 | -0.542001 |
| 24 | 6  | 0 | 3.838309  | 1.259251  | -1.396267 |
| 25 | 1  | 0 | 3.736436  | 2.292859  | -1.047567 |
| 26 | 1  | 0 | 4.873936  | 0.955683  | -1.196351 |
| 27 | 1  | 0 | 3.713736  | 1.257048  | -2.486275 |
| 28 | 1  | 0 | -2.060544 | -2.639476 | 1.612816  |
| 29 | 1  | 0 | -1.748150 | 3.401582  | -1.156009 |
| 30 | 6  | 0 | 0.658163  | 3.426529  | -0.135868 |
| 31 | 1  | 0 | 1.540881  | 3.096926  | -0.691381 |
| 32 | 1  | 0 | 0.237787  | 4.317851  | -0.612095 |
| 33 | 1  | 0 | 0.978613  | 3.665570  | 0.882183  |
| 34 | 6  | 0 | 0.397857  | -2.117151 | 2.348752  |
| 35 | 1  | 0 | 0.655290  | -1.545670 | 3.245452  |
| 36 | 1  | 0 | -0.092572 | -3.052810 | 2.635118  |
| 37 | 1  | 0 | 1.335877  | -2.328930 | 1.825886  |

-----  
Rotational constants (GHZ):      0.3662699      0.2403827      0.1967072  
Standard basis: 6-31G(d) (6D, 7F)

[L(Me)<sub>2</sub>FeCl<sub>ax</sub>(**5**)<sub>eq</sub>]<sup>+</sup>

| Center<br>Number | Atomic<br>Number | Atomic<br>Type | Coordinates (Angstroms) |           |           |
|------------------|------------------|----------------|-------------------------|-----------|-----------|
|                  |                  |                | X                       | Y         | Z         |
| 1                | 26               | 0              | -1.210086               | 0.008713  | -0.374490 |
| 2                | 7                | 0              | -1.864652               | 1.879669  | -0.673575 |
| 3                | 17               | 0              | -0.440927               | 0.187577  | 1.858425  |
| 4                | 7                | 0              | -3.035899               | -0.243308 | -0.019079 |
| 5                | 7                | 0              | -1.242133               | -1.997162 | -0.116471 |
| 6                | 6                | 0              | -3.134229               | 2.021680  | -0.469216 |
| 7                | 6                | 0              | -5.224485               | 0.681524  | 0.220671  |
| 8                | 1                | 0              | -5.885597               | 1.541318  | 0.189991  |
| 9                | 6                | 0              | -3.497651               | -1.478810 | 0.262956  |
| 10               | 6                | 0              | -3.864413               | 0.822647  | -0.059144 |
| 11               | 6                | 0              | -2.408068               | -2.451678 | 0.207440  |
| 12               | 6                | 0              | -5.711253               | -0.591478 | 0.535592  |
| 13               | 1                | 0              | -6.764126               | -0.727648 | 0.759417  |
| 14               | 6                | 0              | -4.846824               | -1.690405 | 0.553247  |



|    |    |   |           |           |           |
|----|----|---|-----------|-----------|-----------|
| 15 | 1  | 0 | -5.211610 | -2.685878 | 0.783905  |
| 16 | 8  | 0 | 0.592594  | 0.415204  | -0.900757 |
| 17 | 13 | 0 | 2.204759  | -0.193531 | -1.617269 |
| 18 | 8  | 0 | 2.795972  | -0.036677 | 0.244750  |
| 19 | 6  | 0 | 2.364188  | -2.031031 | -2.326960 |
| 20 | 1  | 0 | 1.514432  | -2.333488 | -2.955806 |
| 21 | 1  | 0 | 3.243133  | -2.065430 | -2.985194 |
| 22 | 1  | 0 | 2.509727  | -2.816786 | -1.575118 |
| 23 | 13 | 0 | 1.350397  | 0.991157  | 0.631709  |
| 24 | 6  | 0 | 1.741513  | 2.780592  | 1.307131  |
| 25 | 1  | 0 | 0.851409  | 3.339049  | 1.618813  |
| 26 | 1  | 0 | 2.388132  | 2.714944  | 2.192461  |
| 27 | 1  | 0 | 2.279176  | 3.386760  | 0.567048  |
| 28 | 1  | 0 | -2.579239 | -3.502864 | 0.440933  |
| 29 | 1  | 0 | -3.648372 | 2.970920  | -0.622679 |
| 30 | 6  | 0 | -1.095691 | 3.026934  | -1.156304 |
| 31 | 1  | 0 | -1.744235 | 3.873416  | -1.403183 |
| 32 | 1  | 0 | -0.380947 | 3.330334  | -0.386553 |
| 33 | 1  | 0 | -0.522587 | 2.721407  | -2.034487 |
| 34 | 6  | 0 | -0.121943 | -2.931452 | -0.148043 |
| 35 | 1  | 0 | 0.268582  | -2.988854 | -1.165439 |
| 36 | 1  | 0 | 0.674556  | -2.543128 | 0.492200  |
| 37 | 1  | 0 | -0.413431 | -3.929953 | 0.193925  |
| 38 | 13 | 0 | 4.347293  | -0.404531 | 1.018638  |
| 39 | 6  | 0 | 3.036229  | 1.271114  | -2.646224 |
| 40 | 1  | 0 | 2.572264  | 1.372329  | -3.637759 |
| 41 | 1  | 0 | 2.962684  | 2.256435  | -2.165661 |
| 42 | 1  | 0 | 4.103915  | 1.087280  | -2.830058 |
| 43 | 6  | 0 | 5.718879  | -1.153203 | -0.152228 |
| 44 | 1  | 0 | 5.340267  | -1.991193 | -0.750762 |
| 45 | 1  | 0 | 6.086689  | -0.401380 | -0.863349 |
| 46 | 1  | 0 | 6.585305  | -1.513104 | 0.414479  |
| 47 | 6  | 0 | 4.448610  | -0.005598 | 2.931397  |
| 48 | 1  | 0 | 3.476288  | -0.031716 | 3.438142  |
| 49 | 1  | 0 | 5.110323  | -0.711072 | 3.448836  |
| 50 | 1  | 0 | 4.870519  | 0.995083  | 3.099452  |

-----  
Rotational constants (GHZ):       0.3257879       0.1121246       0.1065782  
Standard basis: 6-31G(d) (6D, 7F)

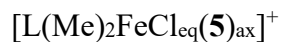

| Center<br>Number | Atomic<br>Number | Atomic<br>Type | Coordinates (Angstroms) |           |           |
|------------------|------------------|----------------|-------------------------|-----------|-----------|
|                  |                  |                | X                       | Y         | Z         |
| 1                | 26               | 0              | -1.203098               | 0.748368  | 0.722319  |
| 2                | 7                | 0              | -1.996080               | 2.095735  | -0.540914 |
| 3                | 17               | 0              | 0.640275                | 2.021676  | 1.644487  |
| 4                | 7                | 0              | -2.622573               | -0.255058 | 0.085386  |
| 5                | 7                | 0              | -1.073547               | -0.795322 | 1.983216  |
| 6                | 6                | 0              | -2.964375               | 1.604734  | -1.242014 |
| 7                | 6                | 0              | -4.390874               | -0.534403 | -1.486979 |
| 8                | 1                | 0              | -4.987186               | -0.145535 | -2.305701 |
| 9                | 6                | 0              | -2.853297               | -1.473785 | 0.616456  |
| 10               | 6                | 0              | -3.364688               | 0.231006  | -0.929831 |
| 11               | 6                | 0              | -1.943713               | -1.720432 | 1.737850  |

|    |    |   |           |           |           |
|----|----|---|-----------|-----------|-----------|
| 12 | 6  | 0 | -4.631686 | -1.807949 | -0.960844 |
| 13 | 1  | 0 | -5.422207 | -2.423304 | -1.377516 |
| 14 | 6  | 0 | -3.866896 | -2.287788 | 0.108174  |
| 15 | 1  | 0 | -4.053505 | -3.267897 | 0.534374  |
| 16 | 8  | 0 | 0.051174  | 0.180988  | -0.612558 |
| 17 | 13 | 0 | 1.042906  | -1.358287 | -0.971646 |
| 18 | 8  | 0 | 2.516213  | -0.279476 | -0.295293 |
| 19 | 6  | 0 | 0.755914  | -2.967365 | 0.144230  |
| 20 | 1  | 0 | -0.251310 | -3.388661 | 0.013080  |
| 21 | 1  | 0 | 1.448006  | -3.753846 | -0.187408 |
| 22 | 1  | 0 | 0.922087  | -2.842654 | 1.221232  |
| 23 | 13 | 0 | 1.495533  | 1.224325  | -0.344214 |
| 24 | 6  | 0 | 2.210537  | 2.706255  | -1.393546 |
| 25 | 1  | 0 | 1.653562  | 3.644267  | -1.292850 |
| 26 | 1  | 0 | 3.240295  | 2.925119  | -1.081440 |
| 27 | 1  | 0 | 2.247033  | 2.454163  | -2.460987 |
| 28 | 1  | 0 | -2.014539 | -2.630771 | 2.332876  |
| 29 | 1  | 0 | -3.489793 | 2.184901  | -2.001340 |
| 30 | 6  | 0 | -1.601715 | 3.485725  | -0.760959 |
| 31 | 1  | 0 | -2.264495 | 3.991926  | -1.470107 |
| 32 | 1  | 0 | -1.612200 | 4.015738  | 0.196062  |
| 33 | 1  | 0 | -0.576871 | 3.509956  | -1.141368 |
| 34 | 6  | 0 | -0.163724 | -0.961459 | 3.115361  |
| 35 | 1  | 0 | 0.865177  | -0.928262 | 2.748510  |
| 36 | 1  | 0 | -0.294700 | -0.122342 | 3.805074  |
| 37 | 1  | 0 | -0.337831 | -1.904111 | 3.643527  |
| 38 | 13 | 0 | 4.238959  | -0.637814 | -0.080709 |
| 39 | 6  | 0 | 1.247231  | -1.590124 | -2.919035 |
| 40 | 1  | 0 | 0.338700  | -2.014524 | -3.369375 |
| 41 | 1  | 0 | 1.448158  | -0.650696 | -3.451406 |
| 42 | 1  | 0 | 2.063125  | -2.281623 | -3.170697 |
| 43 | 6  | 0 | 4.787990  | -2.450263 | -0.558505 |
| 44 | 1  | 0 | 4.309258  | -3.201969 | 0.082828  |
| 45 | 1  | 0 | 4.514276  | -2.698975 | -1.591856 |
| 46 | 1  | 0 | 5.871869  | -2.582914 | -0.463914 |
| 47 | 6  | 0 | 5.326337  | 0.830661  | 0.616736  |
| 48 | 1  | 0 | 4.762397  | 1.538247  | 1.236348  |
| 49 | 1  | 0 | 6.160575  | 0.453222  | 1.220756  |
| 50 | 1  | 0 | 5.773884  | 1.409101  | -0.203446 |

-----  
Rotational constants (GHZ):           0.2693386           0.1364382           0.1202377  
Standard basis: 6-31G(d) (6D, 7F)

**[L(Ph)<sub>2</sub>FeCl<sub>ax</sub>(4)<sub>eq</sub>]<sup>+</sup>**

| Center<br>Number | Atomic<br>Number | Atomic<br>Type | Coordinates (Angstroms) |           |           |
|------------------|------------------|----------------|-------------------------|-----------|-----------|
|                  |                  |                | X                       | Y         | Z         |
| 1                | 26               | 0              | 0.076627                | 0.634695  | -0.034953 |
| 2                | 7                | 0              | 2.052167                | 0.783006  | -0.478480 |
| 3                | 17               | 0              | 0.525677                | 0.667937  | 2.240524  |
| 4                | 7                | 0              | 0.231845                | 2.497580  | -0.150002 |
| 5                | 7                | 0              | -1.894745               | 1.147917  | 0.013314  |
| 6                | 6                | 0              | 4.242087                | -0.260764 | -0.065017 |
| 7                | 6                | 0              | 2.469090                | 2.014922  | -0.458940 |
| 8                | 6                | 0              | 1.634350                | 4.429162  | -0.166397 |

|    |    |   |           |           |           |
|----|----|---|-----------|-----------|-----------|
| 9  | 1  | 0 | 2.625187  | 4.864710  | -0.241730 |
| 10 | 6  | 0 | -0.867103 | 3.262263  | 0.017469  |
| 11 | 6  | 0 | 3.008555  | -0.244330 | -0.730236 |
| 12 | 6  | 0 | -3.049992 | 0.329089  | -0.171802 |
| 13 | 6  | 0 | 1.461693  | 3.044345  | -0.240465 |
| 14 | 6  | 0 | -2.067323 | 2.438353  | 0.051583  |
| 15 | 6  | 0 | 2.699067  | -1.238927 | -1.667094 |
| 16 | 6  | 0 | -3.223423 | -0.821203 | 0.612769  |
| 17 | 6  | 0 | 0.504422  | 5.233328  | 0.010246  |
| 18 | 1  | 0 | 0.612342  | 6.310992  | 0.075038  |
| 19 | 6  | 0 | 3.636642  | -2.226869 | -1.958485 |
| 20 | 1  | 0 | 3.406741  | -2.982642 | -2.703554 |
| 21 | 6  | 0 | -0.764427 | 4.653344  | 0.100945  |
| 22 | 1  | 0 | -1.651093 | 5.263793  | 0.236326  |
| 23 | 6  | 0 | 5.165941  | -1.264773 | -0.350435 |
| 24 | 1  | 0 | 6.113877  | -1.285664 | 0.178333  |
| 25 | 6  | 0 | -4.349959 | -1.623621 | 0.419013  |
| 26 | 1  | 0 | -4.495291 | -2.494966 | 1.050350  |
| 27 | 6  | 0 | -3.991099 | 0.650433  | -1.163171 |
| 28 | 6  | 0 | 4.868994  | -2.245246 | -1.299023 |
| 29 | 6  | 0 | -5.288280 | -1.303678 | -0.565938 |
| 30 | 1  | 0 | -6.156904 | -1.936946 | -0.717264 |
| 31 | 6  | 0 | -5.104447 | -0.166194 | -1.355338 |
| 32 | 1  | 0 | -5.823396 | 0.083196  | -2.129857 |
| 33 | 8  | 0 | -0.106561 | -1.298650 | 0.186896  |
| 34 | 6  | 0 | -1.136942 | -1.319431 | -2.746191 |
| 35 | 1  | 0 | -2.189952 | -1.322330 | -3.055464 |
| 36 | 1  | 0 | -0.813002 | -0.267428 | -2.754671 |
| 37 | 1  | 0 | -0.579923 | -1.823176 | -3.547912 |
| 38 | 6  | 0 | -1.084504 | -2.312083 | 3.100584  |
| 39 | 1  | 0 | -1.662142 | -3.151483 | 2.688270  |
| 40 | 1  | 0 | -0.640504 | -2.683472 | 4.034563  |
| 41 | 1  | 0 | -1.799848 | -1.533249 | 3.392794  |
| 42 | 1  | 0 | -3.829373 | 1.512280  | -1.804293 |
| 43 | 1  | 0 | -2.521534 | -1.045862 | 1.405119  |
| 44 | 1  | 0 | -3.059511 | 2.886494  | 0.075249  |
| 45 | 1  | 0 | 1.751559  | -1.206029 | -2.195338 |
| 46 | 1  | 0 | 5.591200  | -3.025292 | -1.519016 |
| 47 | 1  | 0 | 4.453819  | 0.478166  | 0.702082  |
| 48 | 1  | 0 | 3.510606  | 2.274248  | -0.641789 |
| 49 | 13 | 0 | -0.913746 | -2.266016 | -1.032630 |
| 50 | 13 | 0 | 0.381991  | -1.705199 | 1.924756  |
| 51 | 6  | 0 | 2.150414  | -2.530496 | 2.135711  |
| 52 | 1  | 0 | 2.839323  | -2.381385 | 1.298728  |
| 53 | 1  | 0 | 2.648581  | -2.155367 | 3.040216  |
| 54 | 1  | 0 | 2.039531  | -3.615094 | 2.276227  |
| 55 | 6  | 0 | -1.282240 | -4.155620 | -0.703917 |
| 56 | 1  | 0 | -0.415115 | -4.770834 | -0.981152 |
| 57 | 1  | 0 | -1.506739 | -4.376686 | 0.345599  |
| 58 | 1  | 0 | -2.125919 | -4.509524 | -1.308841 |

-----  
Rotational constants (GHZ):      0.1544748      0.1243025      0.0895312  
Standard basis: 6-31G(d) (6D, 7F)

[L(Ph)<sub>2</sub>FeCl<sub>eq</sub>(4)<sub>ax</sub>]<sup>+</sup>  
-----

| Center<br>Number | Atomic<br>Number | Atomic<br>Type | Coordinates (Angstroms) |           |           |
|------------------|------------------|----------------|-------------------------|-----------|-----------|
|                  |                  |                | X                       | Y         | Z         |
| 1                | 26               | 0              | 0.017502                | 0.334397  | -0.705260 |
| 2                | 7                | 0              | -2.014234               | 0.629503  | -0.777360 |
| 3                | 17               | 0              | 0.089230                | -1.884073 | -1.441416 |
| 4                | 7                | 0              | -0.033863               | 2.191106  | -0.485988 |
| 5                | 7                | 0              | 2.035559                | 0.734485  | -0.698210 |
| 6                | 6                | 0              | -3.162797               | -1.261672 | -1.837473 |
| 7                | 6                | 0              | -2.322993               | 1.887119  | -0.650144 |
| 8                | 6                | 0              | -1.295266               | 4.224509  | -0.459836 |
| 9                | 1                | 0              | -2.257633               | 4.724994  | -0.484369 |
| 10               | 6                | 0              | 1.123556                | 2.887689  | -0.440192 |
| 11               | 6                | 0              | -3.106397               | -0.293522 | -0.827096 |
| 12               | 6                | 0              | 3.175439                | -0.128769 | -0.732929 |
| 13               | 6                | 0              | -1.224070               | 2.830601  | -0.517744 |
| 14               | 6                | 0              | 2.273618                | 2.001880  | -0.526202 |
| 15               | 6                | 0              | -4.131122               | -0.212693 | 0.129871  |
| 16               | 6                | 0              | 3.312161                | -1.065289 | -1.765177 |
| 17               | 6                | 0              | -0.105083               | 4.952081  | -0.376945 |
| 18               | 1                | 0              | -0.133247               | 6.035584  | -0.327865 |
| 19               | 6                | 0              | -5.206383               | -1.096455 | 0.071640  |
| 20               | 1                | 0              | -5.986813               | -1.042874 | 0.824537  |
| 21               | 6                | 0              | 1.122346                | 4.283422  | -0.374577 |
| 22               | 1                | 0              | 2.058699                | 4.830124  | -0.333720 |
| 23               | 6                | 0              | -4.252513               | -2.127502 | -1.896694 |
| 24               | 1                | 0              | -4.301339               | -2.867307 | -2.689646 |
| 25               | 6                | 0              | 4.449611                | -1.867957 | -1.816362 |
| 26               | 1                | 0              | 4.560628                | -2.582215 | -2.626289 |
| 27               | 6                | 0              | 4.167252                | -0.018645 | 0.255174  |
| 28               | 6                | 0              | -5.271739               | -2.052415 | -0.944175 |
| 29               | 6                | 0              | 5.437183                | -1.762537 | -0.833989 |
| 30               | 1                | 0              | 6.312825                | -2.403163 | -0.872295 |
| 31               | 6                | 0              | 5.290775                | -0.840344 | 0.204519  |
| 32               | 1                | 0              | 6.045851                | -0.765608 | 0.981096  |
| 33               | 8                | 0              | 0.025309                | -0.347960 | 1.118334  |
| 34               | 6                | 0              | 0.093120                | -0.852081 | 4.244655  |
| 35               | 1                | 0              | -0.870184               | -1.207838 | 4.634750  |
| 36               | 1                | 0              | 0.698084                | -1.736659 | 4.020681  |
| 37               | 1                | 0              | 0.582146                | -0.314911 | 5.067783  |
| 38               | 6                | 0              | 1.825048                | -3.033125 | 1.362838  |
| 39               | 1                | 0              | 1.892326                | -3.275431 | 2.432225  |
| 40               | 1                | 0              | 1.924736                | -3.986573 | 0.826020  |
| 41               | 1                | 0              | 2.703608                | -2.430834 | 1.108371  |
| 42               | 1                | 0              | 4.036185                | 0.677556  | 1.078999  |
| 43               | 1                | 0              | 2.547902                | -1.149376 | -2.527586 |
| 44               | 1                | 0              | 3.287952                | 2.395575  | -0.484760 |
| 45               | 1                | 0              | -4.062895               | 0.513111  | 0.935630  |
| 46               | 1                | 0              | -6.109202               | -2.741833 | -0.988477 |
| 47               | 1                | 0              | -2.374050               | -1.323535 | -2.576557 |
| 48               | 1                | 0              | -3.356731               | 2.228854  | -0.664138 |
| 49               | 13               | 0              | -0.170484               | 0.346929  | 2.721866  |
| 50               | 13               | 0              | 0.097906                | -2.210608 | 0.915319  |
| 51               | 6                | 0              | -1.598718               | -3.069286 | 1.414971  |
| 52               | 1                | 0              | -2.493302               | -2.577148 | 1.017725  |
| 53               | 1                | 0              | -1.614921               | -4.105319 | 1.050304  |
| 54               | 1                | 0              | -1.713670               | -3.128844 | 2.506468  |

|    |   |   |           |          |          |
|----|---|---|-----------|----------|----------|
| 55 | 6 | 0 | -0.641081 | 2.245169 | 2.906963 |
| 56 | 1 | 0 | 0.066356  | 2.923741 | 2.414618 |
| 57 | 1 | 0 | -1.636223 | 2.471950 | 2.502538 |
| 58 | 1 | 0 | -0.661922 | 2.517686 | 3.969038 |

-----  
Rotational constants (GHZ):      0.1579543      0.1129569      0.0917468  
Standard basis: 6-31G(d) (6D, 7F)

[L(Ph)<sub>2</sub>FeCl<sub>ax</sub>(7)<sub>eq</sub>]<sup>+</sup>

| Center<br>Number | Atomic<br>Number | Atomic<br>Type | Coordinates (Angstroms) |           |           |
|------------------|------------------|----------------|-------------------------|-----------|-----------|
|                  |                  |                | X                       | Y         | Z         |
| 1                | 26               | 0              | 0.199105                | 0.608726  | -0.282694 |
| 2                | 7                | 0              | 2.224305                | 0.496963  | -0.380650 |
| 3                | 17               | 0              | 0.021011                | 0.394281  | 2.027634  |
| 4                | 7                | 0              | 0.600288                | 2.431468  | -0.294829 |
| 5                | 7                | 0              | -1.661463               | 1.364228  | -0.318699 |
| 6                | 6                | 0              | 4.234258                | -0.698979 | 0.386940  |
| 7                | 6                | 0              | 2.782616                | 1.674716  | -0.370125 |
| 8                | 6                | 0              | 2.227194                | 4.181152  | -0.293460 |
| 9                | 1                | 0              | 3.267133                | 4.490610  | -0.306607 |
| 10               | 6                | 0              | -0.405555               | 3.336093  | -0.259491 |
| 11               | 6                | 0              | 3.071938                | -0.649153 | -0.400318 |
| 12               | 6                | 0              | -2.881123               | 0.638515  | -0.199639 |
| 13               | 6                | 0              | 1.893718                | 2.824152  | -0.311395 |
| 14               | 6                | 0              | -1.695043               | 2.662760  | -0.244194 |
| 15               | 6                | 0              | 2.732363                | -1.731048 | -1.224678 |
| 16               | 6                | 0              | -3.648767               | 0.728121  | 0.965298  |
| 17               | 6                | 0              | 1.196280                | 5.124830  | -0.254773 |
| 18               | 1                | 0              | 1.432245                | 6.183623  | -0.237681 |
| 19               | 6                | 0              | 3.578907                | -2.835576 | -1.290658 |
| 20               | 1                | 0              | 3.325287                | -3.664815 | -1.944085 |
| 21               | 6                | 0              | -0.137642               | 4.706976  | -0.237484 |
| 22               | 1                | 0              | -0.949620               | 5.426021  | -0.206659 |
| 23               | 6                | 0              | 5.061896                | -1.817224 | 0.326281  |
| 24               | 1                | 0              | 5.950657                | -1.860606 | 0.948336  |
| 25               | 6                | 0              | -4.814087               | -0.031175 | 1.084176  |
| 26               | 1                | 0              | -5.398457               | 0.031525  | 1.996898  |
| 27               | 6                | 0              | -3.268622               | -0.227368 | -1.239044 |
| 28               | 6                | 0              | 4.742342                | -2.882784 | -0.519047 |
| 29               | 6                | 0              | -5.223867               | -0.872823 | 0.048862  |
| 30               | 1                | 0              | -6.132894               | -1.457052 | 0.147362  |
| 31               | 6                | 0              | -4.460339               | -0.958770 | -1.116883 |
| 32               | 1                | 0              | -4.782595               | -1.591644 | -1.937744 |
| 33               | 8                | 0              | -0.212805               | -1.234082 | -0.460426 |
| 34               | 13               | 0              | -1.720899               | -2.236085 | -0.618078 |
| 35               | 8                | 0              | -1.748242               | -2.548869 | 1.083242  |
| 36               | 6                | 0              | -2.162922               | -3.316401 | -2.178831 |
| 37               | 1                | 0              | -2.227833               | -2.744557 | -3.111889 |
| 38               | 1                | 0              | -1.388987               | -4.081300 | -2.321557 |
| 39               | 1                | 0              | -3.112337               | -3.846019 | -2.038771 |
| 40               | 13               | 0              | -0.152236               | -1.860472 | 1.347832  |
| 41               | 6                | 0              | 1.301978                | -2.808633 | 2.230100  |
| 42               | 1                | 0              | 2.264827                | -2.291507 | 2.166628  |
| 43               | 1                | 0              | 1.068752                | -2.943136 | 3.294244  |

|    |   |   |           |           |           |
|----|---|---|-----------|-----------|-----------|
| 44 | 1 | 0 | 1.427540  | -3.810960 | 1.803098  |
| 45 | 1 | 0 | -2.723419 | -0.217442 | -2.180464 |
| 46 | 1 | 0 | -3.311621 | 1.356156  | 1.783607  |
| 47 | 1 | 0 | -2.631411 | 3.213935  | -0.169362 |
| 48 | 1 | 0 | 1.817650  | -1.696326 | -1.802858 |
| 49 | 1 | 0 | 5.390513  | -3.752562 | -0.564765 |
| 50 | 1 | 0 | 4.462830  | 0.111233  | 1.073316  |
| 51 | 1 | 0 | 3.861917  | 1.801107  | -0.430670 |

-----  
 Rotational constants (GHZ):           0.1734971           0.1348213           0.0901252  
 Standard basis: 6-31G(d) (6D, 7F)

[L(Ph)<sub>2</sub>FeCl<sub>eq</sub>(7)<sub>ax</sub>]<sup>+</sup>

| Center<br>Number | Atomic<br>Number | Atomic<br>Type | Coordinates (Angstroms) |           |           |
|------------------|------------------|----------------|-------------------------|-----------|-----------|
|                  |                  |                | X                       | Y         | Z         |
| 1                | 26               | 0              | -0.109695               | 0.330837  | -0.563817 |
| 2                | 7                | 0              | -2.093229               | 0.821738  | -0.497691 |
| 3                | 17               | 0              | -0.309234               | -2.049943 | -0.785840 |
| 4                | 7                | 0              | 0.047045                | 2.176033  | -0.425376 |
| 5                | 7                | 0              | 1.912950                | 0.509616  | -0.815259 |
| 6                | 6                | 0              | -3.392976               | -0.933623 | -1.586514 |
| 7                | 6                | 0              | -2.259791               | 2.091739  | -0.273182 |
| 8                | 6                | 0              | -0.975524               | 4.299800  | -0.039422 |
| 9                | 1                | 0              | -1.872254               | 4.888273  | 0.124141  |
| 10               | 6                | 0              | 1.271187                | 2.745608  | -0.462997 |
| 11               | 6                | 0              | -3.262191               | 0.003820  | -0.553605 |
| 12               | 6                | 0              | 2.921738                | -0.487299 | -1.002812 |
| 13               | 6                | 0              | -1.062228               | 2.916633  | -0.219315 |
| 14               | 6                | 0              | 2.302235                | 1.749058  | -0.708064 |
| 15               | 6                | 0              | -4.277657               | 0.142460  | 0.405913  |
| 16               | 6                | 0              | 2.743668                | -1.472960 | -1.981973 |
| 17               | 6                | 0              | 0.285373                | 4.901944  | -0.077944 |
| 18               | 1                | 0              | 0.378173                | 5.974406  | 0.057670  |
| 19               | 6                | 0              | -5.422975               | -0.645369 | 0.318443  |
| 20               | 1                | 0              | -6.198424               | -0.549311 | 1.072184  |
| 21               | 6                | 0              | 1.426342                | 4.124522  | -0.296102 |
| 22               | 1                | 0              | 2.412781                | 4.574769  | -0.334377 |
| 23               | 6                | 0              | -4.550687               | -1.702613 | -1.675080 |
| 24               | 1                | 0              | -4.656844               | -2.416359 | -2.486054 |
| 25               | 6                | 0              | 3.734426                | -2.430427 | -2.181682 |
| 26               | 1                | 0              | 3.600081                | -3.183820 | -2.951503 |
| 27               | 6                | 0              | 4.083718                | -0.480736 | -0.213074 |
| 28               | 6                | 0              | -5.565348               | -1.563722 | -0.724343 |
| 29               | 6                | 0              | 4.888237                | -2.430834 | -1.393387 |
| 30               | 1                | 0              | 5.647655                | -3.192074 | -1.542321 |
| 31               | 6                | 0              | 5.058339                | -1.458233 | -0.406678 |
| 32               | 1                | 0              | 5.946102                | -1.461295 | 0.218143  |
| 33               | 8                | 0              | -0.034973               | -0.008761 | 1.316691  |
| 34               | 13               | 0              | 1.379203                | -0.357223 | 2.366643  |
| 35               | 8                | 0              | 0.994171                | -2.025197 | 2.468509  |
| 36               | 6                | 0              | 2.667991                | 0.865078  | 3.157966  |
| 37               | 1                | 0              | 2.810968                | 1.781646  | 2.575337  |
| 38               | 1                | 0              | 2.324059                | 1.166942  | 4.155343  |
| 39               | 1                | 0              | 3.641500                | 0.380480  | 3.290831  |

|    |    |   |           |           |           |
|----|----|---|-----------|-----------|-----------|
| 40 | 13 | 0 | -0.494197 | -1.848945 | 1.525444  |
| 41 | 6  | 0 | -2.198491 | -2.577784 | 2.121458  |
| 42 | 1  | 0 | -3.009224 | -2.459947 | 1.396412  |
| 43 | 1  | 0 | -2.081940 | -3.651190 | 2.318948  |
| 44 | 1  | 0 | -2.515794 | -2.116481 | 3.065158  |
| 45 | 1  | 0 | 4.210411  | 0.266827  | 0.565450  |
| 46 | 1  | 0 | 1.849318  | -1.476497 | -2.593823 |
| 47 | 1  | 0 | 3.346980  | 2.035669  | -0.818219 |
| 48 | 1  | 0 | -4.148354 | 0.828861  | 1.237697  |
| 49 | 1  | 0 | -6.458490 | -2.177446 | -0.789596 |
| 50 | 1  | 0 | -2.606601 | -1.043178 | -2.324617 |
| 51 | 1  | 0 | -3.249393 | 2.534764  | -0.174379 |

-----  
 Rotational constants (GHZ):      0.1805462      0.1166695      0.0942159  
 Standard basis: 6-31G(d) (6D, 7F)

[L(Ph)<sub>2</sub>FeCl<sub>ax</sub>(S)<sub>eq</sub>]<sup>+</sup>

| Center<br>Number | Atomic<br>Number | Atomic<br>Type | Coordinates (Angstroms) |           |           |
|------------------|------------------|----------------|-------------------------|-----------|-----------|
|                  |                  |                | X                       | Y         | Z         |
| 1                | 26               | 0              | -1.093097               | -0.642296 | -0.193533 |
| 2                | 7                | 0              | -2.696271               | 0.629596  | -0.229224 |
| 3                | 17               | 0              | -0.501464               | -0.167450 | 2.036212  |
| 4                | 7                | 0              | -2.489035               | -1.877863 | 0.059078  |
| 5                | 7                | 0              | -0.018208               | -2.410257 | -0.154767 |
| 6                | 6                | 0              | -3.821132               | 0.013001  | -0.011424 |
| 7                | 6                | 0              | -4.828519               | -2.317425 | 0.310187  |
| 8                | 1                | 0              | -5.844263               | -1.943374 | 0.385534  |
| 9                | 6                | 0              | -2.222974               | -3.200909 | 0.090195  |
| 10               | 6                | 0              | -3.761451               | -1.429936 | 0.147201  |
| 11               | 6                | 0              | -0.794292               | -3.444583 | -0.025363 |
| 12               | 6                | 0              | -4.558443               | -3.687164 | 0.365347  |
| 13               | 1                | 0              | -5.369731               | -4.396246 | 0.492296  |
| 14               | 6                | 0              | -3.242442               | -4.142572 | 0.247312  |
| 15               | 1                | 0              | -3.010486               | -5.202109 | 0.276430  |
| 16               | 8                | 0              | 0.177057                | 0.691638  | -0.694286 |
| 17               | 13               | 0              | 1.807135                | 1.041487  | -1.529859 |
| 18               | 8                | 0              | 2.381942                | 1.338036  | 0.316546  |
| 19               | 6                | 0              | 2.736946                | -0.390678 | -2.507590 |
| 20               | 1                | 0              | 2.044250                | -1.005896 | -3.098734 |
| 21               | 1                | 0              | 3.430653                | 0.063399  | -3.228371 |
| 22               | 1                | 0              | 3.319436                | -1.078789 | -1.886789 |
| 23               | 13               | 0              | 0.645749                | 1.495821  | 0.848605  |
| 24               | 6                | 0              | 0.215227                | 3.174997  | 1.736020  |
| 25               | 1                | 0              | -0.858198               | 3.294601  | 1.914187  |
| 26               | 1                | 0              | 0.713540                | 3.235820  | 2.712688  |
| 27               | 1                | 0              | 0.552684                | 4.034828  | 1.144677  |
| 28               | 1                | 0              | -0.393460               | -4.455362 | 0.036818  |
| 29               | 1                | 0              | -4.772858               | 0.541014  | 0.009498  |
| 30               | 13               | 0              | 3.988680                | 1.608713  | 0.996621  |
| 31               | 6                | 0              | 1.698194                | 2.819084  | -2.391631 |
| 32               | 1                | 0              | 1.162192                | 2.764427  | -3.350604 |
| 33               | 1                | 0              | 1.190333                | 3.584392  | -1.789060 |
| 34               | 1                | 0              | 2.696564                | 3.212924  | -2.628555 |
| 35               | 6                | 0              | 5.438816                | 1.837093  | -0.292171 |

|    |   |   |           |           |           |
|----|---|---|-----------|-----------|-----------|
| 36 | 1 | 0 | 5.424546  | 1.064073  | -1.070594 |
| 37 | 1 | 0 | 5.359977  | 2.803233  | -0.808584 |
| 38 | 1 | 0 | 6.423067  | 1.808546  | 0.189661  |
| 39 | 6 | 0 | 4.097549  | 1.638448  | 2.951360  |
| 40 | 1 | 0 | 3.219918  | 1.212904  | 3.452260  |
| 41 | 1 | 0 | 4.980901  | 1.094190  | 3.309204  |
| 42 | 1 | 0 | 4.205965  | 2.669548  | 3.315526  |
| 43 | 6 | 0 | -2.745247 | 2.049832  | -0.370217 |
| 44 | 6 | 0 | -3.509091 | 2.826519  | 0.516814  |
| 45 | 6 | 0 | -2.036731 | 2.662447  | -1.412717 |
| 46 | 6 | 0 | -3.577241 | 4.206993  | 0.344388  |
| 47 | 1 | 0 | -4.010474 | 2.355056  | 1.357309  |
| 48 | 6 | 0 | -2.127035 | 4.042531  | -1.584577 |
| 49 | 1 | 0 | -1.433618 | 2.061244  | -2.080294 |
| 50 | 6 | 0 | -2.893689 | 4.816820  | -0.710533 |
| 51 | 1 | 0 | -4.156553 | 4.806227  | 1.040232  |
| 52 | 1 | 0 | -1.589842 | 4.512068  | -2.402772 |
| 53 | 1 | 0 | -2.949414 | 5.892948  | -0.843497 |
| 54 | 6 | 0 | 1.386476  | -2.712612 | -0.217745 |
| 55 | 6 | 0 | 1.870737  | -3.582341 | -1.202801 |
| 56 | 6 | 0 | 2.248849  | -2.197463 | 0.756336  |
| 57 | 6 | 0 | 3.219266  | -3.937615 | -1.211044 |
| 58 | 1 | 0 | 1.199494  | -3.955953 | -1.971047 |
| 59 | 6 | 0 | 3.590574  | -2.577873 | 0.751307  |
| 60 | 1 | 0 | 1.856792  | -1.556698 | 1.536910  |
| 61 | 6 | 0 | 4.081123  | -3.441938 | -0.231755 |
| 62 | 1 | 0 | 3.593429  | -4.601686 | -1.984193 |
| 63 | 1 | 0 | 4.251901  | -2.213858 | 1.533111  |
| 64 | 1 | 0 | 5.128138  | -3.729055 | -0.231823 |

-----  
Rotational constants (GHZ):           0.1232287           0.1005973           0.0670417  
Standard basis: 6-31G(d) (6D, 7F)

[L(Ph)<sub>2</sub>FeCl<sub>eq</sub>(S)<sub>ax</sub>]<sup>+</sup>

| Center<br>Number | Atomic<br>Number | Atomic<br>Type | Coordinates (Angstroms) |           |           |
|------------------|------------------|----------------|-------------------------|-----------|-----------|
|                  |                  |                | X                       | Y         | Z         |
| 1                | 26               | 0              | 0.663001                | -0.910441 | -0.427082 |
| 2                | 7                | 0              | 2.647825                | -0.492370 | -0.147947 |
| 3                | 17               | 0              | 0.051043                | 0.866912  | -1.956080 |
| 4                | 7                | 0              | 1.089201                | -2.267332 | 0.764242  |
| 5                | 7                | 0              | -1.038024               | -2.014204 | -0.574186 |
| 6                | 6                | 0              | 3.144254                | -1.207531 | 0.817022  |
| 7                | 6                | 0              | 2.597038                | -3.173555 | 2.375531  |
| 8                | 1                | 0              | 3.561525                | -3.147683 | 2.871706  |
| 9                | 6                | 0              | 0.162224                | -3.201075 | 1.063031  |
| 10               | 6                | 0              | 2.286763                | -2.239124 | 1.383301  |
| 11               | 6                | 0              | -1.017482               | -3.043439 | 0.223023  |
| 12               | 6                | 0              | 1.641057                | -4.137984 | 2.706763  |
| 13               | 1                | 0              | 1.857394                | -4.872660 | 3.475317  |
| 14               | 6                | 0              | 0.410802                | -4.165603 | 2.042563  |
| 15               | 1                | 0              | -0.337862               | -4.914339 | 2.279044  |
| 16               | 8                | 0              | 0.246589                | 0.347690  | 0.958033  |
| 17               | 13               | 0              | -1.177194               | 0.612311  | 2.128902  |
| 18               | 8                | 0              | -1.605844               | 2.064053  | 0.903339  |



|    |    |   |           |           |           |
|----|----|---|-----------|-----------|-----------|
| 19 | 6  | 0 | -2.610263 | -0.748041 | 2.204945  |
| 20 | 1  | 0 | -2.243990 | -1.699118 | 2.618719  |
| 21 | 1  | 0 | -3.393530 | -0.409104 | 2.897288  |
| 22 | 1  | 0 | -3.105802 | -0.975199 | 1.254082  |
| 23 | 13 | 0 | 0.021153  | 1.911414  | 0.087908  |
| 24 | 6  | 0 | 1.110522  | 3.525616  | 0.042457  |
| 25 | 1  | 0 | 2.085291  | 3.362220  | -0.428395 |
| 26 | 1  | 0 | 0.606639  | 4.317780  | -0.526548 |
| 27 | 1  | 0 | 1.289504  | 3.916345  | 1.052234  |
| 28 | 1  | 0 | -1.833280 | -3.763314 | 0.254124  |
| 29 | 1  | 0 | 4.172764  | -1.089586 | 1.154318  |
| 30 | 13 | 0 | -2.895191 | 3.275851  | 0.925252  |
| 31 | 6  | 0 | -0.523520 | 1.384382  | 3.823867  |
| 32 | 1  | 0 | -0.075592 | 0.614596  | 4.468312  |
| 33 | 1  | 0 | 0.242965  | 2.158920  | 3.685291  |
| 34 | 1  | 0 | -1.334037 | 1.837902  | 4.411067  |
| 35 | 6  | 0 | -4.186484 | 3.111236  | 2.382173  |
| 36 | 1  | 0 | -4.689444 | 2.135433  | 2.371142  |
| 37 | 1  | 0 | -3.701413 | 3.201949  | 3.362732  |
| 38 | 1  | 0 | -4.963180 | 3.882637  | 2.327673  |
| 39 | 6  | 0 | -2.851966 | 4.587870  | -0.525660 |
| 40 | 1  | 0 | -2.394608 | 4.204499  | -1.445777 |
| 41 | 1  | 0 | -3.860277 | 4.939427  | -0.776300 |
| 42 | 1  | 0 | -2.276666 | 5.476287  | -0.230218 |
| 43 | 6  | 0 | 3.475549  | 0.504223  | -0.742699 |
| 44 | 6  | 0 | 3.463390  | 0.649235  | -2.136585 |
| 45 | 6  | 0 | 4.295536  | 1.329334  | 0.043774  |
| 46 | 6  | 0 | 4.296492  | 1.588076  | -2.739810 |
| 47 | 1  | 0 | 2.822959  | 0.017397  | -2.742331 |
| 48 | 6  | 0 | 5.111857  | 2.277414  | -0.568906 |
| 49 | 1  | 0 | 4.259249  | 1.257450  | 1.126847  |
| 50 | 6  | 0 | 5.120193  | 2.404147  | -1.960178 |
| 51 | 1  | 0 | 4.296990  | 1.685814  | -3.820954 |
| 52 | 1  | 0 | 5.733144  | 2.924609  | 0.042597  |
| 53 | 1  | 0 | 5.757210  | 3.144466  | -2.434314 |
| 54 | 6  | 0 | -2.112631 | -1.944893 | -1.517670 |
| 55 | 6  | 0 | -2.410058 | -3.058888 | -2.317792 |
| 56 | 6  | 0 | -2.859766 | -0.767153 | -1.646110 |
| 57 | 6  | 0 | -3.458502 | -2.995032 | -3.233935 |
| 58 | 1  | 0 | -1.798968 | -3.954508 | -2.246134 |
| 59 | 6  | 0 | -3.916529 | -0.721363 | -2.551966 |
| 60 | 1  | 0 | -2.628924 | 0.086184  | -1.020944 |
| 61 | 6  | 0 | -4.216934 | -1.829103 | -3.349139 |
| 62 | 1  | 0 | -3.675906 | -3.854159 | -3.861185 |
| 63 | 1  | 0 | -4.506488 | 0.186014  | -2.639697 |
| 64 | 1  | 0 | -5.033635 | -1.779891 | -4.062749 |

---

Rotational constants (GHZ):           0.1094523           0.0937778           0.0776555  
Standard basis: 6-31G(d) (6D, 7F)
